1  
2  
3  
4  
5  
6  
7  
8  
9  
10  
11  
12  
13  
14  
15  
16  
17  
18  
19  
20  
21  
22  
23

A Murine Model for Enhancement of *Streptococcus pneumoniae* Pathogenicity Upon Viral Infection  
and Advanced Age

Basma H. Joma<sup>\*1, 2</sup>, Nalat Siwapornchai<sup>\*1</sup>, Vijay K. Vanguri<sup>3</sup>, Anishma Shrestha<sup>1</sup>, Sara E. Roggensack<sup>1, 4</sup>, Bruce A. Davidson<sup>5</sup>, Albert K. Tai<sup>6</sup>, Anders P. Hakansson<sup>7</sup>, Simin N. Meydani<sup>8</sup>, John M. Leong<sup>#1,9</sup> and Elsa N. Bou Ghanem<sup>#10</sup>

\* Co-first authors; B.H.J. and N.S. contributed equally to this work; the order of their names was listed alphabetically

# Co-corresponding authors

<sup>1</sup> Department of Molecular Biology and Microbiology at Tufts University School of Medicine, Boston, Massachusetts, USA

<sup>2</sup> Graduate Program in Immunology, Tufts Graduate School of Biomedical Sciences, Boston, USA

<sup>3</sup> UMass Memorial Health Care, University of Massachusetts Medical School, Worcester, Massachusetts, USA

<sup>4</sup> Graduate Program in Molecular Microbiology, Tufts Graduate School of Biomedical Sciences, Boston, USA

<sup>5</sup> Department of Anesthesiology, University at Buffalo School of Medicine, Buffalo, New York, USA

<sup>6</sup> Department of Immunology, Tufts University School of Medicine, Boston, Massachusetts, USA

<sup>7</sup> Department of Translational Medicine, Lund University, Malmö, Sweden

24 <sup>8</sup> Jean Mayer USDA Human Nutrition Research Center on Aging at Tufts University,  
25 Boston, Massachusetts, USA

26 <sup>9</sup> Stuart B. Levy Center for Integrated Management of Antimicrobial Resistance at Tufts  
27 (Levy CIMAR)

28 <sup>10</sup> Department of Microbiology and Immunology, University at Buffalo School of Medicine,  
29 Buffalo, New York, USA

30 Running Title: Murine Model of Influenza-Pneumococcal Co-infection

31 # Address correspondence and reprint requests to John M. Leong (J.M.L.), Department of  
32 Molecular Biology and Microbiology, Tufts University School of Medicine, 136 Harrison  
33 Avenue, Boston, MA 02114 and Elsa Bou Ghanem (E.N.B.G.), Department of Microbiology  
34 and Immunology, University at Buffalo School of Medicine, 955 Main Street, Buffalo, New  
35 York, USA. E-mail addresses: [john.leong@tufts.edu](mailto:john.leong@tufts.edu) (J.M.L.) and [elsaboug@buffalo.edu](mailto:elsaboug@buffalo.edu)  
36 (E.N.B.G.)

37  
38 Keywords: Co-infection, secondary bacterial pneumonia, *Streptococcus pneumoniae*,  
39 Influenza A, colonization, aging, neutrophils, inflammation

40

41

42

43

44

45

46

47

48

49 **ABSTRACT**

50 *Streptococcus pneumoniae* (pneumococcus) resides asymptotically in the nasopharynx  
51 but can progress from benign colonizer to lethal pulmonary or systemic pathogen. Both  
52 viral infection and aging are risk factors for serious pneumococcal infections. Previous  
53 work established a murine model that featured the movement of pneumococcus from the  
54 nasopharynx to the lung upon nasopharyngeal inoculation with influenza A virus (IAV) but  
55 did not fully recapitulate the severe disease associated with human co-infection. We built  
56 upon this model by first establishing pneumococcal nasopharyngeal colonization, then  
57 inoculating both the nasopharynx and lungs with IAV. In young (2 months) mice, co-  
58 infection triggered bacterial dispersal from the nasopharynx into the lungs, pulmonary  
59 inflammation, disease and mortality in a fraction of mice. In old mice (20-22 months), co-  
60 infection resulted in earlier and more severe disease. Aging was not associated with  
61 greater bacterial burdens but rather with more rapid pulmonary inflammation and damage.  
62 Both aging and IAV infection led to inefficient bacterial killing by neutrophils *ex vivo*.  
63 Conversely, aging and pneumococcal colonization also blunted IFN- $\alpha$  production and  
64 increased pulmonary IAV burden. Thus, in this multistep model, IAV promotes  
65 pneumococcal pathogenicity by modifying bacterial behavior in the nasopharynx,  
66 diminishing neutrophil function, and enhancing bacterial growth in the lung, while  
67 pneumococci increase IAV burden likely by compromising a key antiviral response. Thus,  
68 this model provides a means to elucidate factors, such as age and co-infection, that  
69 promote the evolution of *S. pneumoniae* from asymptomatic colonizer to invasive  
70 pathogen, as well as to investigate consequences of this transition on antiviral defense.

71

72

## 73 INTRODUCTION

74 *Streptococcus pneumoniae* (pneumococcus) is a Gram-positive pathobiont that  
75 typically resides asymptotically in the nasopharynx of healthy individuals (1). It is  
76 hypothesized *S. pneumoniae* establishes an asymptomatic biofilm on the nasopharyngeal  
77 epithelium by attenuating the production of virulence factors and concomitant inflammation  
78 (2-5). However, when immunity is compromised, a common occurrence in aging (6),  
79 pneumococci can cause serious disease such as otitis media, pneumonia, meningitis and  
80 bacteremia (7). In humans, pneumococcal carriage is believed to be a prerequisite to  
81 invasive disease (8, 9). Bacterial isolates from invasive infections are genetically identical  
82 to those found in the nasopharynx of patients (9); this and other longitudinal studies have  
83 led to the suggestion that invasive disease often involves pneumococcal carriage in the  
84 upper respiratory tract (8, 9).

85 The rate of reported colonization is quite variable among adults and is confounded  
86 by differences in detection methods, but colonization may be more prevalent in the elderly  
87 (10). A meta-analysis of twenty nine published studies found that in individuals above 60  
88 years of age, conventional culture showed 0-39% carriage, while 3-23% carriage was  
89 detected by molecular methods (11). Importantly, carriage was higher among nursing  
90 home residents (11). In older adults, conventional culture methods estimated carriage to  
91 be <5% (12-14) but more recent data from European studies using molecular detection  
92 methods indicated that carriage in the elderly ranges from 10-22% (10, 15-17). Thus,  
93 carriage rates may be much higher than what was previously estimated in elderly  
94 individuals (12-14).

95 Advanced age increases the risk of invasive pneumococcal disease and  
96 pneumococcal pneumonia (7). Aging is associated with immunosenescence, the overall

97 decline in immunity that accompanies aging, as well as inflammaging, a low-grade chronic  
98 inflammation that render the elderly more susceptible to pulmonary infections (18).  
99 Polymorphonuclear leukocytes (PMNs), also known as neutrophils, are a crucial  
100 determinant of age-related susceptibility to primary pneumococcal infection (19). These  
101 cells are required to control bacterial burden at the start of infection (20-22). However,  
102 aging is accompanied by impaired PMN anti-bacterial function (23, 24). In addition, aged  
103 hosts experience exacerbated PMN pulmonary influx during primary pneumococcal  
104 pneumonia (19, 25, 26), and persistence of PMNs in the airways beyond the first few days  
105 leads to tissue destruction and systemic spread of infection (27, 28).

106 In addition to advanced age, epidemiological and experimental data show that  
107 invasive pneumococcal infections are strongly associated with viral infection (29-31). The  
108 risk of pneumococcal pneumonia is enhanced 100-fold by influenza A virus (IAV) infection  
109 (32, 33), resulting in the seasonal peak of pneumococcal disease during influenza  
110 outbreaks (33). Further, *S. pneumoniae* is historically among the most common etiologies  
111 of secondary bacterial pneumonia following influenza and associated with the most severe  
112 outcomes (30, 34-36). Symptoms of secondary bacterial pneumonia include cough,  
113 dyspnea, fever, muscle aches and when severe result in hospitalizations, respiratory  
114 failure, mechanical ventilation, and can lead to death (30, 34-36).

115 IAV commonly infects the upper respiratory tract, and at this location viral infection  
116 can enhance the nutritional environment for pneumococcus in the nasopharynx, leading to  
117 greater bacterial loads and/or higher rates of bacterial acquisition (4, 37). IAV can also  
118 directly bind the pneumococcal surface and enhance bacterial binding to the pulmonary  
119 epithelium leading to increased colonization (38). In addition, viral infection of the  
120 pulmonary epithelium induces the release of host components, such as adenosine

121 triphosphate and norepinephrine, that are sensed by biofilm-associated pneumococci,  
122 triggering both the production of pneumococcal virulence factors and the dispersal of  
123 bacteria (4, 37, 39, 40). This in turn facilitates bacterial spread to and colonization of the  
124 lower respiratory tract (4).

125 IAV can infect not just the upper respiratory tract, but also the lungs, and murine  
126 models featuring sequential pulmonary challenge with IAV first followed by pneumococcus  
127 show the virus can compromise immune defense against pneumococcus (29, 34, 41). In  
128 these models, IAV alters both the pulmonary environment and the immune response to  
129 enhance subsequent bacterial colonization and tissue damage. For example, IAV pre-  
130 infection increases mucus production and fibrosis and dysregulates ciliary function (34, 42,  
131 43), thus impairing mechanical clearance of invading bacteria. Viral enzymes, along with  
132 virus-elicited inflammation, result in the exposure of epithelial proteins that promote  
133 pneumococcal adherence to and invasion of host cells (41, 44-46). Further, IAV triggers  
134 type I and II interferon (IFN) responses that impair both the recruitment and antibacterial  
135 function of phagocytes key to defense against pneumococcus (47-50). The combined  
136 tissue damage and the compromise in immune function render the lung more permissive  
137 for invasive *S. pneumoniae* infection (34, 45, 47). Less understood is how *S. pneumoniae*  
138 infection may alter host antiviral responses and viral replication in the lung.

139 Notably, advanced age and IAV infection appear to synergistically enhance  
140 susceptibility to pneumococcal lung infections (6, 18, 51, 52). Indeed, individuals  $\geq 65$   
141 years old account for 70-85% of deaths due to pneumonia and influenza (52). Interestingly,  
142 elderly individuals with influenza-like symptoms were reported to have an increased  
143 pneumococcal carriage rate of 30% (53). In animal models in which bacteria are directly  
144 instilled into the lungs following influenza infection, aging is associated with increase

145 susceptibility of secondary pneumococcal pneumonia (51). Age-dependent changes in the  
146 expression of key components of innate immune signaling contribute to disease in this co-  
147 infection model (51). However, the factors, including those that are age-dependent, that  
148 trigger the transition of pneumococci from benign colonizer to pathogen are poorly defined,  
149 in part because small animal models that recapitulate the transition from asymptomatic  
150 colonization to overt clinical illness are lacking.

151         These above studies indicate that bacterial-viral synergy is multi-factorial and can  
152 occur at different sites with the host. Insight into events that occur in both the nasopharynx  
153 and lung and contribute to the heightened susceptibility of the aged to serious disease  
154 upon pneumococcal/IAV coinfection is needed to develop better therapeutic and  
155 preventative approaches. A current murine model for the spread of nasopharyngeal  
156 pneumococci to the lung after viral infection of the upper respiratory tract relies on initial  
157 bacterial colonization of the nasopharynx followed by viral infection, but does not  
158 recapitulate the severe signs of human clinical disease (4). Influenza virus is capable of  
159 infection not just of the upper respiratory tract, but also the lung (54, 55). To better  
160 investigate the transition of *S. pneumoniae* from asymptomatic colonizers to invasive  
161 pathogens following IAV infection, as well as the effect of host age on the disease process,  
162 we built upon this mouse model of *S. pneumoniae*/IAV co-infection by incorporating viral  
163 infection of the lower respiratory tract. The enhanced model recapitulates the severe and  
164 age-exacerbated clinical disease observed in humans.

165

166

167

168

## 169 RESULTS

### 170 Intranasal IAV inoculation of mice pre-colonized with *S. pneumoniae* strain TIGR4 171 does not result in disease.

172 Biofilm-grown *S. pneumoniae* are relatively less virulent and thus adapted to host  
173 colonization rather than disease (2-4). A previously established murine model in  
174 BALB/cByJ mice utilizes biofilm-grown *S. pneumoniae* serotype 2 strain D39 and serotype  
175 19F strain EF3030 to establish heavy carriage in the nasopharynx (4). Then, two days  
176 after bacterial inoculation, IAV is introduced into the nasal cavity and results in the spread  
177 of pneumococci from the nasopharynx (NP) to the lung (4). We first recapitulated this  
178 model with *S. pneumoniae* strain TIGR4, an invasive serotype 4 strain (56, 57) that we  
179 previously found to be highly virulent in aged C57BL/6 mice (19). We intranasally (i.n.)  
180 inoculated young (8-10 weeks) C57BL/6 (B6) mice with  $1 \times 10^6$  colony forming units (CFU)  
181 of biofilm-generated *S. pneumoniae* TIGR4 by delivering the bacteria in 10  $\mu$ l (a volume  
182 that is unlikely to inoculate the lung (58)) to the nares of non-anesthetized mice. Forty-  
183 eight hours later, mice were i.n. inoculated with 10  $\mu$ l containing 20 PFU of Influenza A  
184 (IAV) virus PR8. (See Fig. S1A for general scheme). Control groups of mice were either  
185 infected with *S. pneumoniae* or IAV alone as controls. However, under these conditions,  
186 mice did not display signs of sickness, nor did bacteria spread into the lungs after seven  
187 days (not shown).

188 To increase the likelihood of clinical disease, we repeated the experiment with a  
189 five-fold higher ( $5 \times 10^6$  CFU) dose of bacteria and a 25-fold higher dose (500 PFU) of IAV.  
190 Similar to earlier reports for other *S. pneumoniae* strains (D39 and EF3030) (4), IAV co-  
191 infection resulted in a 10-fold increase in *S. pneumoniae* TIGR4 in the nasal lavage fluid at  
192 2 days post-IAV infection (Fig. S1B). In addition, IAV co-infection was associated with the



193 detection of bacteria in the lungs of 40% of mice, compared to none in the control group  
194 infected with *S. pneumoniae* TIGR4 alone. This trend is consistent with the previous  
195 BALB/cByJ mice model of coinfection (4), but did not reach statistical significance.  
196 Furthermore, co-infection was not associated with weight loss when assessed over the  
197 course of 4 days post-infection (Fig. S1C). We also scored mice for clinical signs of the  
198 disease based on weight loss, activity, posture and breathing and ranging from healthy  
199 [score = 0] to moribund [score = 25] and requiring euthanasia if the score was >9 as  
200 previously described (59). As secondary pneumonia can occur several days following IAV  
201 (41), we monitored the disease course up to 7 days, but did not detect disease symptoms  
202 or death in any of the co-infected mice (100% survival and 0 daily clinical score, including  
203 weight loss for all mice). Therefore, despite promoting bacterial dispersal from the  
204 nasopharynx into the lungs, similar to the previous work with other *S. pneumoniae* strains  
205 and BALB/c mice (4), this model of *S. pneumoniae* TIGR4/IAV coinfection did not result in  
206 overt clinical signs of disease.

207

### 208 **Combined intranasal/intratracheal IAV inoculation of *S. pneumoniae*-colonized mice** 209 **results in bacterial dissemination and disease**

210 IAV infection is not restricted to the upper respiratory tract, and can cause viral  
211 pneumonia in a significant fraction of infected individuals (54, 55) that is likely to be crucial  
212 for creating an environment in the lungs that is more permissive for bacterial infection (29,  
213 34, 41). Indeed, viral lung infection diminishes pulmonary defenses against *S. pneumoniae*  
214 and promotes secondary bacterial pneumonia (34, 41, 44-50). Delivery of IAV i.n. to  
215 BALB/cByJ mice results in signs of viral pneumonia (4), but we found that pulmonary  
216 access of inocula delivered via the nasopharynx is more restricted in B6 mice as compared

217 to BALB/c mice (unpublished observation), raising the possibility that the lack of disease  
218 observed in co-infected B6 mice was due to the exclusive localization of virus in the nasal  
219 cavity, with limited opportunity to alter systemic or pulmonary immunity. In fact, when we  
220 measured pulmonary viral load two days following i.n. infection with 500 PFU IAV, we were  
221 unable to detect any PFU in the lungs, while delivery of 20 PFU of IAV by intratracheal (i.t.)  
222 inoculation was sufficient to establish lung infection (Fig. S2).

223 Therefore, to ensure delivery of IAV to both the nasopharynx and the lungs, we co-  
224 infected *S. pneumoniae*-colonized B6 mice by delivering the virus by two routes. Mice  
225 were inoculated i.n. with  $5 \times 10^6$  CFU of biofilm grown *S. pneumoniae* TIGR4 and 48 hours  
226 later infected not only with 500 PFU IAV i.n., but also 20 PFU i.t. to ensure pulmonary  
227 infection (Fig. 1A). No mice in a control group inoculated i.n. with *S. pneumoniae* alone lost  
228 weight (Fig 1B), displayed clinical signs of sickness (Fig 1C), or died (Fig 1D). A second  
229 control group, inoculated i.n. and i.t. with IAV alone displayed no disease until after day 4,  
230 when they exhibited weight loss (Fig 1B) and began succumbing to viral infection (Fig 1D).  
231 In contrast, inoculation of IAV to animals pre-colonized with *S. pneumoniae* caused a  
232 bacterial/viral co-infection that resulted in weight loss (Fig. 1B), clinical symptoms (Fig. 1C)  
233 and death (Fig. 1D) that were detected starting day 2 post IAV introduction. At this time  
234 point, a higher fraction of co-infected mice displayed signs of disease as compared to  
235 controls infected with IAV only (55% vs 64%), and disease was more severe in mice that  
236 displayed clinical symptoms, although this did not reach statistical significance. In addition,  
237 the overall survival rate among co-infected mice was significantly lower than mice singly  
238 infected with *S. pneumoniae* alone (Fig. 1D). These signs of exacerbated disease were  
239 associated with significantly higher bacterial burdens in the nasopharynx as well as  
240 translocation of *S. pneumoniae* into the lung in comparison to mice colonized with the

241 bacteria or mice infected with IAV alone (Fig. 1E). These findings demonstrated that the  
242 new co-infection model leads to disease in a fraction of young healthy mice, which may  
243 increase the likelihood of detecting enhanced susceptibility in vulnerable hosts.

244

245 **PMN depletion may have a small effect on the course of disease during IAV/S.**

246 ***pneumoniae* co-infection**

247 We previously found that in primary pneumococcal pneumonia, PMNs are required  
248 to control bacterial numbers early in the infection process; however, their persistence in  
249 the lungs is detrimental to the host and can promote the infection at later time points (20).  
250 To address the role of PMNs during co-infection, we treated young mice with PMN-  
251 depleting anti-Ly6G antibody (1A8) one day prior to pneumococcal colonization and  
252 throughout the co-infection (based on timeline in Figure 1A). We then confirmed that the  
253 cells were depleted by staining with the RB6 antibody followed by flow cytometry (Fig S3).  
254 Following infection, we measured bacterial burden, weight loss, clinical score and survival  
255 over time. PMN depletion had no effect on bacterial burdens in the nasopharynx or  
256 bacterial spread to the lungs or blood following co-infection (Fig 2A and B). However,  
257 PMN-depleted mice appeared to lose more weight at day 3 and 4 post co-infection as  
258 compared to the control group (Fig. 2C), and a greater proportion of PMN-depleted mice  
259 displayed clinical signs of sickness as compared to the control group at both 18 hours and  
260 48 hours post IAV infection (Fig. 2D). Additionally, lower survival was observed in the  
261 PMN-depleted group, in which 25% survived to day 7 compared to ~43% in the untreated  
262 control group (Fig. 2E). These differences did not reach statistical significance, but raise  
263 the possibility that PMNs provide a measure of defense to co-infection in young mice.

264

265 **Aging increases susceptibility to IAV/*S. pneumoniae* co-infection.**

266 We next tested if the new co-infection mouse model (Fig. 1A) recapitulates the age-  
267 associated increase in susceptibility to secondary pneumococcal pneumonia. Old (20-24  
268 months) B6 mice were inoculated i.n. with  $5 \times 10^6$  CFU of biofilm grown *S. pneumoniae*  
269 TIGR4 and 48 hours later were infected with 500 PFU IAV i.n. plus 20 PFU i.t. When  
270 compared to young co-infected controls, old mice displayed significantly more severe signs  
271 of disease, as indicated by a higher average clinical score (Fig. 3A). While seven of 16  
272 (~44%) young mice showed clinical symptoms (i.e., clinical score greater than 1; Fig. 3A),  
273 all 13 old mice showed at least some degree of illness by day 2 post co-infection ( $p =$   
274 0.0012, by Fisher's exact test). Furthermore, whereas only 25% (4 out of 16) young mice  
275 had a clinical score greater than 2, which is indicative of more severe disease, 92% (12 out  
276 of 13) aged mice fell into this category ( $p = 0.005$ , by Fisher's exact test). In addition, old  
277 mice died at a significantly accelerated rate. By day 2 post co-infection, 60% of old mice  
278 had succumbed to the infection compared to only 25% of young mice. Differences in  
279 survival were observed at each successive time point, and at the end of the experiment on  
280 day 8, only 14% of old mice remained alive compared to 50% of young mice (Fig. 3B).  
281 Importantly, the accelerated death observed in co-infected old mice was not observed in  
282 old mice infected with *S. pneumoniae* alone or IAV alone (Fig S4).

283 We next tested whether these differences could be attributed to increased bacterial  
284 loads in the nasopharynx, lungs, or blood. As old mice got sicker at earlier time points after  
285 IAV co-infection, with the majority succumbing by day 4, we compared bacterial burden  
286 across age groups at 18 and 48 hours after IAV co-infection. We found no significant  
287 differences in the numbers of pneumococci in nasopharyngeal washes, pulmonary  
288 homogenates, or blood at either time point (Fig 3C-E). Taken together, these findings

289 suggest that with aging there is an increased susceptibility to co-infection and an  
290 accelerated course of disease that could not be attributed to a more rapid bacterial  
291 dissemination or higher bacterial loads in the nasopharynx, lung, or bloodstream.

292

### 293 **Aging is associated with more rapid lung inflammation.**

294 To determine if the accelerated rate of death examined in co-infected old mice was  
295 due to more lung damage, we analyzed H&E-stained lung sections for alveolar congestion,  
296 hemorrhage, alveolar thickness, neutrophils and lymphocytic infiltration (Fig. 4A). We  
297 found that the alveolar spaces of both uninfected old and young mice were clear and free  
298 of inflammatory or red blood cells (Fig. 4A). At 18h hours post co-infection, the lungs of  
299 young mice did not show any overt signs of disease (Fig. 4A). In contrast, co-infected old  
300 mice had significant lung pathology by 18 hours post infection, including a loss of alveolar  
301 architecture, and spotty inflammation consisting of infiltrates composed of neutrophils,  
302 alveolar macrophages and mononuclear cells that were mixed with red blood cells (Fig.  
303 4A). At 48 hours post-infection, there were clear signs of lung pathology in both young and  
304 old co-infected mice (Fig. 4A).

305 Next, we tested the levels of inflammatory cytokines in co-infected young vs old  
306 mice. No significant differences between age groups were detected in baseline  
307 (uninfected) levels of any of the cytokines tested between the age groups (Fig 4B and not  
308 shown). However, consistent with the enhanced PMN influx at 18 h post-infection in aged  
309 mice, old mice had significantly higher levels of IL-10, IL-2, IL-1 $\beta$  and TNF $\alpha$  (Fig 4B)  
310 compared with young mice. Levels of IL-12p70, IL-17, IL-6 and IFN $\gamma$ , were slightly but not  
311 significantly elevated 18 hours post co-infection (Fig S5A). By 48 hours there were no

312 significant differences between young and old mice in cytokine levels except for IFN $\gamma$ ,  
313 which was higher in young mice (Fig S5B).

314 We previously found that mice suffering from exacerbated PMN-mediated  
315 pulmonary inflammation during pneumococcal pneumonia did not display higher bacterial  
316 burdens in their lungs (27) despite a higher likelihood of severe disease (19, 20, 27). To  
317 test whether PMN influx was also higher in old co-infected mice, we measured the  
318 percentage and number of pulmonary PMNs (Ly6G<sup>+</sup>) by flow cytometry. We found that old  
319 mice had significantly (6-fold) higher percentages and numbers of PMNs in their lungs as  
320 compared to young controls at 18 hours post co-infection (Fig 4C). By 48 hours, most aged  
321 mice had succumbed to the infection (Fig. 3B), confounding interpretation of PMN  
322 numbers at this time point; PMN percentages and numbers appeared to be higher in  
323 young mice, but the differences were not statistically significant (Fig. 4C). Macrophages,  
324 which are important for host resistance to *S. pneumoniae*/IAV co-infection (49) and display  
325 age-driven changes (60, 61), displayed no significant age-dependent differences in either  
326 percentage or number at 18 or 48 hours after infection (Fig. S6). Taken together, these  
327 findings demonstrate that aging is associated with earlier pulmonary inflammation and  
328 damage following co-infection, which may contribute to the accelerated death observed in  
329 this mouse group.

330

### 331 **Aging and IAV infection diminish the ability of PMNs to kill *S. pneumoniae* ex vivo.**

332 Aged, co-infected mice experience an accelerated rate of pulmonary inflammation  
333 but bacterial loads in the lungs of aged mice were not lower than in young mice, indicating  
334 that PMN infiltration is not associated with bacterial clearance. Both aging (24) and IAV  
335 infection (62) have been reported to diminish antibacterial function of PMNs. To assess the

336 ability of PMNs to kill *S. pneumoniae* in our co-infection model, we used a well-established  
337 opsonophagocytic (OPH) killing assay (19, 63). We first compared the bactericidal activity  
338 of bone marrow-derived PMNs from young or aged mice. The percentage of bacteria killed  
339 upon incubation with PMNs for 45 or 90 minutes was determined by comparing surviving  
340 CFU to no PMN control reactions at the same timepoint. We found that as previously  
341 reported for humans (23) and mice (24) the ability of PMNs isolated from uninfected old  
342 mice to kill pneumococci was reduced 5-fold compared to young controls regardless of the  
343 duration of infection (Fig. 5).

344 We next examined the bactericidal activity of PMNs isolated from young or old mice  
345 2-days after i.t./i.n. IAV inoculation. As previously reported (47-50), PMNs from young IAV  
346 infected mice had a slight (2-fold) but significant reduction in their ability to kill  
347 pneumococci as compared to PMNs from uninfected controls (Fig. 5). Strikingly, IAV  
348 infection diminished the ability of PMNs from old mice to kill *S. pneumoniae*; instead,  
349 PMNs from IAV infected old mice promoted a slight increase in bacterial numbers (Fig. 5).  
350 These findings suggest that IAV infection completely abrogates the ability of PMNs from  
351 old mice to kill *S. pneumoniae*.

352

353 **Aging and prior colonization with *S. pneumoniae* result in impaired IFN- $\alpha$  production**  
354 **and higher viral burden in the lungs.**

355 Finally, we investigated whether aging and/or bacterial co-infection had an impact  
356 on antiviral responses. Old or young B6 mice were inoculated i.n. with  $5 \times 10^6$  CFU of  
357 biofilm grown *S. pneumoniae* TIGR4 or mock challenged with PBS and 48 hours later were  
358 infected with 500 PFU IAV i.n. and 20 PFU i.t. At 48 hours following viral infection, we  
359 compared viral burden in the lung across age groups. We found that bacterial colonization



360 resulted in 10-fold (and statistically significant) higher pulmonary viral loads when  
361 compared to mock-colonized controls, regardless of host age (Fig. 6A). Further, we found  
362 that in co-infected hosts, aging was associated with significantly increased viral loads in  
363 the lungs (Fig. 6A), suggesting that enhanced viral loads and impaired antiviral defenses  
364 contribute to the differences in clinical manifestation across host age.

365 To test whether bacterial colonization and aging impair antiviral immune responses,  
366 we measured the levels of IFN- $\alpha$ , a cytokine crucial for antiviral defense (64). We found  
367 that in young mice, despite the higher viral burden (Fig. 6A), prior bacterial colonization  
368 resulted in a 3-fold (but not statistically significant) decrease in IFN- $\alpha$  production in the  
369 lungs in response to IAV challenge (Fig. 6B). Notably, aging was associated with  
370 (statistically significant) 5- and 3-fold lower levels of IFN- $\alpha$  correspondingly in mice infected  
371 with IAV alone or co-infected with IAV and *S. pneumoniae*. No differences in IFN- $\alpha$   
372 production were observed in the sera (Fig S7). These findings suggest that both  
373 pneumococcal infection and aging blunt antiviral responses in this mouse model.

374

## 375 **DISCUSSION**

376 *S. pneumoniae* remains a leading cause of secondary bacterial pneumonia  
377 following influenza A virus infection and is associated with severe disease (30, 34-36),  
378 particularly in the elderly (52). The majority of *S. pneumoniae*/IAV co-infection  
379 experimental studies have delivered bacteria into the lungs of mice pre-infected with IAV to  
380 reveal changes in the host lungs and immune response that are crucial for priming  
381 invasive pneumococcal disease (34, 41, 44-50). In this study, to investigate the transition  
382 of *S. pneumoniae* from colonizer to pathogen upon IAV co-infection, a process that has  
383 just started to be elucidated (4, 37), we have developed a modified murine infection model



384 that recapitulates this transition and results in severe clinical disease. In a previously  
385 established model, female BALB/cByJ mice were first colonized intra-nasally with biofilm-  
386 grown pneumococci and then infected with IAV by delivering the virus to the nasopharynx  
387 (4, 40). This model showed that changes in the host environment in response to viral  
388 infection triggers the dispersal of pneumococci from colonizing biofilms and their spread to  
389 the lower respiratory tract (4). Importantly, the dispersed bacteria expressed higher levels  
390 of virulence factors required for infection, thus, rendering them more highly pathogenic (4).  
391 Nevertheless, upon dispersion following *in vivo* IAV infection, although bacterial migration  
392 to the lung was detected, the burden was less than 100 CFU per lung and the mice did not  
393 suffer overt disease. When we used this model to co-infect male C57BL/6 (B6) mice, we  
394 also observed a significant increase in dispersed bacteria in the nasopharynx, but no  
395 disease and only a transient presence of *S. pneumoniae* in the lungs of B6 mice. Here we  
396 performed experiments in male instead of female mice due to both the easier availability of  
397 aged male animals and the documented higher rate of pneumococcal pneumonia in men  
398 compared to women (65, 66).

399 Previous work of pneumococcal inoculation of IAV-infected lungs showed viral  
400 infection to be crucial for creating an environment in the lungs that is more permissive for  
401 bacterial infection (41, 44-50). The relatively low bacterial burden in co-infected male B6  
402 mice observed here upon IAV inoculation only by the i.n. route suggested that the lung  
403 environment was not sustaining the bacteria. It is possible that human IAV/*S. pneumoniae*  
404 co-infection involves viral infection of not only the upper respiratory tract, but the lower  
405 respiratory tract as well (54, 55). Therefore, we co-infected *S. pneumoniae* colonized B6  
406 mice with IAV by delivering the virus not only i.n. to infect the nasopharynx, but also i.t. to  
407 ensure infection of the lungs. This modified model recapitulated the increase in non-

408 adherent pneumococci in the nasopharynx observed upon viral co-infection (4, 67, 68),  
409 and resulted in bacterial spread into the lungs and circulation that increased over time.  
410 Importantly, this mode of dual infection recapitulated both the increased colonization  
411 burden (69, 70) as well as the clinical signs of severe disease observed in humans (30, 34-  
412 36), and resulted in death of approximately half of co-infected young controls.

413         Although the elderly are at higher risk for secondary pneumococcal pneumonia  
414 following IAV infection, animal studies exploring this age-driven susceptibility to co-  
415 infection are few (51, 71, 72). Here, using the modified model, we found that old mice were  
416 significantly more susceptible to *S. pneumoniae*/IAV co-infection. Old mice displayed more  
417 severe signs of disease as compared to young controls and the majority (>85%) failed to  
418 survive the co-infection. This increased susceptibility in old mice was not linked to higher  
419 bacterial dissemination from the nasopharynx, greater establishment of infection in the  
420 lungs, or systemic spread into the circulation at the time points tested. Susceptibility to viral  
421 infection alone, as measured by weight loss within the first 5 days following IAV, was also  
422 similar between the age groups. Rather, the age-driven susceptibility to co-infection was  
423 associated with earlier and more severe pulmonary inflammation. Production of pulmonary  
424 cytokines is elevated in young mice infected with *S. pneumoniae* at 7 days after IAV  
425 inoculation (73). Further, old mice display changes in the expression of pattern recognition  
426 receptors in the lungs leading to altered inflammatory responses (51). Similar to previous  
427 studies (51), we found here that co-infected old mice had higher levels of TNF $\alpha$  compared  
428 to young controls. However, in contrast to previous reports that found reduced NLRP3  
429 inflammasome expression in the lungs and lower production of IL-1 $\beta$ , we found higher  
430 levels of IL-1 $\beta$  in old vs. young mice. This may be accounted for by differences in  
431 expression of bacterial factors. The expression of pneumolysin, which was found to

432 activate NLRP3 inflammasomes and lead to production of IL-1 $\beta$  (74), was elevated in  
433 pneumococci dispersed from biofilms upon IAV infection (75) and therefore may have  
434 primed the IL-1 $\beta$  production we observed in old mice.

435 We previously found that PMNs were key determinants of disease during primary  
436 pneumococcal pneumonia and are required to initially control bacterial numbers (20, 76).  
437 Therefore, we explored here the role of PMNs in *S. pneumoniae*/IAV co-infection. Similar  
438 to other studies, we found that PMNs are recruited to the lungs of co-infected young mice  
439 (49). Previous reports indicate that the PMN-mediated anti-pneumococcal function in IAV-  
440 infected mice (62) and humans (70) is progressively reduced over time. For example, in  
441 mice, PMNs demonstrably contribute to host defense at 3 days but not at 6 days post-  
442 infection (62). Nevertheless, PMN depletion showed that these cells are important for  
443 control of bacterial transmission (77) and control of pulmonary bacterial numbers (49) in  
444 IAV co-infected mice. Similarly, here we found that PMN depletion starting prior to bacterial  
445 colonization and continuing throughout viral co-infection appeared to slightly worsen  
446 disease progression, with slightly greater average weight loss at days 3 and 4 after viral  
447 inoculation and a greater proportion of PMN-depleted mice succumbing to co-infection.  
448 However, PMN depletion had no significant effect on the number of dispersed *S.*  
449 *pneumoniae* in the nasopharynx or their spread to the lungs and blood. It is possible that,  
450 in this model, IAV may rapidly impair PMN function, limiting their efficacy even in PMN-  
451 replete mice. In fact, we found that within 2 days following IAV infection, the ability of bone  
452 marrow-derived PMNs to kill *S. pneumoniae* was significantly blunted in young mice.  
453 Alternatively, the apparent inability of PMNs to limit bacterial numbers in this model could  
454 be due to the enhanced virulence of pneumococci dispersed from the nasopharyngeal  
455 environment (4) compared to broth-grown bacteria typically used in other models (62).

456 In this study we found that aging was associated with earlier influx of PMNs into the  
457 lungs of co-infected mice. We previously demonstrated that excessive PMN influx into the  
458 lungs is detrimental for the ability of old mice to control invasive disease following primary  
459 pneumococcal pneumonia (19) and that PMN depletion 18 hours after infection boosted  
460 host survival (20). Similarly, greater PMN influx into the lungs of old mice singly infected  
461 with IAV was associated with host mortality, and depletion of these cells six days following  
462 viral infection significantly boosted host survival (78). Uncontrolled PMN influx can result in  
463 tissue damage, disruption of gaseous exchange and pulmonary failure. In fact, it was  
464 reported that in IAV singly infected old mice, PMNs enhanced lung inflammation and  
465 damage and their depletion reduced the levels of inflammatory IL-1 $\beta$  and TNF $\alpha$  (78).  
466 Therefore, the early increase in these inflammatory cytokines and lung damage we  
467 observed here in *S. pneumoniae*/IAV co-infected old mice may be driven by the elevated  
468 levels of pulmonary PMNs.

469 The age-associated increased levels of pulmonary IL-10 during *S. pneumoniae*/IAV  
470 confection observed here may also contribute to the enhanced susceptibility of old mice to  
471 co-infection. IL-10 levels are elevated in co-infected young mice compared to those singly  
472 infected with *S. pneumoniae* (79). We showed that blocking this cytokine boosts PMN anti-  
473 bacterial function by inhibiting ROS production (76), and van der Poll and coworkers  
474 demonstrated that inhibition of IL-10 restores resistance of vulnerable hosts to primary  
475 pneumococcal pneumonia (79).

476 The more severe disease observed in old mice also correlated with higher viral lung  
477 burden during both co-infection with *S. pneumoniae* and IAV and single infection with IAV,  
478 although the difference reached statistical significance only in the former. Production of  
479 type I IFN, which is crucial for control of viral replication, is dysregulated during aging (80)

480 and we found that pulmonary IFN- $\alpha$  levels of co-infected or singly infected old mice were  
481 significantly lower compared their young counterparts. Hence, in this model, enhanced  
482 disease associated with aging may be a reflection of a combination of an exuberant PMN  
483 response and a muted type I interferon response.

484         While many studies have examined the effect of IAV on secondary pneumococcal  
485 pneumonia, the effect of bacterial colonization on viral infection has been less explored.  
486 We found that, regardless of host age, prior colonization with pneumococci resulted in  
487 significantly higher viral pulmonary loads. In experiments involving two different hosts  
488 (ferrets or cotton rats) and two different viruses (IAV and Human RSV, respectively),  
489 nasopharyngeal colonization of donors with *S. pneumoniae* promoted viral transmission  
490 (81, 82). In the latter (rat-RSV) model, prior pneumococcal colonization enhanced viral  
491 infection of the upper respiratory tract but did not promote infection of the lungs (82). A  
492 human experimental pneumococcal colonization study showed that prior colonization with  
493 pneumococci did not increase the burden of a live attenuated influenza virus, but reduced  
494 pro-inflammatory immune responses in the nasopharynx and significantly blunted antiviral  
495 IgG production in the lungs (83). Hence, prior colonization with pneumococci may impair  
496 antiviral defenses. Indeed, we found that in spite of their approximately one log higher viral  
497 lung burden compared to singly infected mice, *S. pneumoniae*-pre-colonized young and  
498 old mice respectively displayed 5 and 3-fold lower levels of pulmonary IFN- $\alpha$  compared to  
499 non-colonized controls.

500         In summary, here we modified existing murine models to establish an experimental  
501 system that reflects the transition of *S. pneumoniae* from asymptomatic colonizer to  
502 invasive pulmonary pathogen upon IAV co-infection. In this model, IAV triggers the  
503 transition of a pathobiont from a commensal to a pathogenic state through modification of

504 bacterial behavior in the nasopharynx, enhancement of bacterial colonization in the lung,  
505 and compromise of PMN-mediated anti-bacterial immunity. In turn, pneumococci modulate  
506 antiviral immune responses and promote IAV infection of the lower respiratory tract.  
507 Importantly, this model recapitulates the susceptibility of aging to co-infections. Moving  
508 forward, this multi-step model can be used to dissect both the multiple phases of  
509 pneumococcal disease progression from commensals to pathogens and the complexity of  
510 viral/bacterial interactions within different hosts, thus helping inform specialized treatment  
511 options (67) tailored to the susceptible elderly population.

512

## 513 **MATERIALS AND METHODS**

514 **Mice.** Young (8-10 weeks) and aged (18-24 months) male C57BL/6 mice were purchased  
515 from Jackson Laboratories (Bar Harbor, ME) and the National Institute of Aging. Mice were  
516 housed in a pathogen-free facility at Tufts University. All procedures were performed in  
517 accordance with Institutional Animal Care and Use Committee guidelines. The number of  
518 mice included in each experiment is based on power analysis. At least 6 mice per group  
519 for determination of bacterial burden and 12 mice per group for monitoring survival were  
520 included to sufficiently power our studies. In each experiment, an equal number of mice  
521 per group were planned. However, slight variations in the number of mice per group at  
522 later time points of several experiments occurred due to the required euthanasia of several  
523 mice in highly susceptible experimental groups.

524

525 **Bacterial biofilms.** NCI-H292 mucoepidermoid carcinoma cells (H292) were grown in 24-  
526 well plates in RPMI 1640 media with 10% FBS and 2mM L-glutamine until confluent. Cells  
527 were washed with 1x PBS and fixed in 4% paraformaldehyde for 1 hour on ice. S.

528 *pneumoniae* TIGR4 (kind gift from Andrew Camilli) were grown on Tryptic Soy Agar plates  
529 supplemented with 5% sheep blood agar (blood agar plates) overnight, then diluted and  
530 grown in chemically defined liquid medium (CDM) (4, 40) supplemented with Oxyrase until  
531 OD<sub>600nm</sub> of 0.2. Bacteria were diluted 1:1000 in CDM and seeded on the fixed H292 cells.  
532 The, bacteria/H292 cells were incubated at 34°C/ 5% CO<sub>2</sub> and media was changed every  
533 12 hours. At 48 hours post-infection, the supernatant containing planktonic bacteria (non-  
534 adherent to NCI-H292 cells) cells was discarded, the cells gently washed with PBS and  
535 adherent biofilms collected in fresh CDM by vigorous pipetting. Biofilm aliquots were then  
536 frozen at -80°C in the CDM with 25% (v/v) glycerol.

537

538 **Intranasal inoculation.** Before use, biofilm aliquots were thawed on ice, washed once and  
539 diluted in PBS to the required concentration. The mice were restrained without anesthesia  
540 and infected i.n. with 10µl (5x10<sup>6</sup> CFU) of biofilm grown *S. pneumoniae*. The inoculum was  
541 equally distributed between the nostrils with a pipette. This method of inoculation results in  
542 pathogen delivery limited to the nasal cavity, without accessing the lower tract in C57BL/6  
543 mice (58). Bacterial titers were confirmed by serial dilution and plating on blood agar  
544 plates. To ensure stable colonization of the biofilm in the nasopharynx, groups of mice  
545 were euthanized at 18 and 48 hours post inoculation, and the nasal washes and tissue  
546 were collected and plated on blood agar plate for enumeration of *S. pneumoniae*.

547

548 **Viral infection.** The mouse-adapted H1N1 Influenza A virus PR8 (A/PR/8/34) was  
549 obtained from Dr. Bruce Davidson (4, 40) and stored at -80 °C. Before use, viral aliquots  
550 were thawed on ice, diluted in PBS and used to inoculate mice. At 48 hours following  
551 bacterial inoculation, mice were infected i.n. with 10µl of 500 plaque forming units (PFU) of



552 virus by pipetting the inoculum into the nostrils of non-anesthetized mice. Following i.n.  
553 inoculation, mice were lightly anesthetized with isoflurane and challenged i.t. with 20 PFU  
554 of virus in a 50µl volume pipetted directly into the trachea with the tongue pulled out to  
555 facilitate delivery (20).

556  
557 **Clinical scoring and bacterial burden.** Following co-infection, mice were monitored daily  
558 and blindly scored for signs of sickness including weight loss, activity, posture and  
559 breathing. Based on these criteria, the mice were given a clinical score of healthy [0] to  
560 moribund [25] modified from what was previously described (59). Any mice displaying a  
561 score above 9 are humanely euthanized in accordance with our protocol. Mice were  
562 euthanized at indicated time points and the lung, nasal lavages and blood collected and  
563 plated on blood agar for enumeration of bacterial loads, as previously described (20). For  
564 collection of sera, blood was collected via cardiac puncture into Microtainer® tubes (BD  
565 Biosciences) and centrifuged at 7607xg for 2 minutes to collect serum as per  
566 manufacturer's instructions.

567  
568 **Depletion of PMNs.** Mice were intraperitoneally (i.p.) injected with 100µl (50µg/mouse) of  
569 anti-Ly6G clone 1A8 (BD Biosciences) to deplete neutrophils. Mice were injected daily with  
570 the depleting antibodies starting one day prior and ending two days after bacterial  
571 inoculation, followed by every other day from day 1 post viral co-infection to the end of  
572 each experiment. Treatment resulted in >90% neutrophil depletion as described below.

573  
574 **Cell isolation and Flow Cytometry.** Mice lungs were harvested, washed in PBS, and  
575 minced into small pieces. The sample was then digested for 45 minutes with RPMI 1640



576 1X supplemented with 10% FBS, 1 mg/ml Type II collagenase (Worthington, Lakewood,  
577 NJ), and 50 U/ml deoxyribonuclease I to obtain a single-cell suspension as previously  
578 described (20). The red blood cells were lysed using ACK lysis buffer (Gibco). Cells were  
579 then stained with anti-mouse Ly6G clone 1A8 (BD Biosciences), F480 clone BM8  
580 (BioLegend), CD11c clone N418 (eBioscience), and CD11b clone M1/70 (eBioscience).  
581 For neutrophil depletion, cells isolated from the lungs at 18 and 48 h post co-infection were  
582 also stained with either Ly6G clone 1A8 or RB6 clone RB6-8C5 (BioLegend) antibodies to  
583 confirm cell depletion. The fluorescence intensities were measured on BD LSR II Flow  
584 Cytometer at Tufts FACS Core Facility (Boston, MA) to capture at least 25,000 cells and  
585 analyzed using FlowJo.

586

587 **Isolation of PMNs and Opsonophagocytic Killing Assay (OPH).** Femurs and tibias of  
588 uninfected mice were collected and flushed with RPMI, supplemented with 10% FBS and 2  
589 mM EDTA to obtain bone marrow cells. Neutrophils were isolated by density gradient  
590 centrifugation, using Histopaque 1119 and Histopaque 1077 as previously described (84).  
591 The neutrophils were resuspended in Hank's (Gibco) buffer/0.1% gelatin with no Ca<sup>+</sup> or  
592 Mg<sup>+</sup> and tested for purity by flow cytometry using anti-Ly6G antibodies (eBioscience)  
593 where 85-90% of enriched cells were Ly6G<sup>+</sup>. The ability of neutrophils to kill bacteria was  
594 measured using a well-established opsonophagocytic (OPH) killing assay as previously  
595 described (20). Briefly,  $2.5 \times 10^5$  neutrophils were incubated in Hank's buffer/0.1% gelatin  
596 with  $10^3$  CFU of *S. pneumoniae* pre-opsonized with 3% mouse sera. The reactions were  
597 incubated in flat bottom 96-well non-binding plates for 45 minutes at 37°C. Each group  
598 was plated on blood agar to enumerate viable CFU. Percent bacterial killing was  
599 calculated in comparison to a no PMN control under the same conditions.

600

601 **Histology.** Whole lungs were harvested from groups of mice at 18 hours and at 48 hours  
602 post co-infection and fixed in 10% neutral buffered formalin for 2 days. The tissues were  
603 then embedded in paraffin, sectioned at 5  $\mu$ m and stained with Hematoxylin and Eosin at  
604 the Animal Histology Core at Tufts University. Sections of lung from three mice per group  
605 were imaged using a Nikon Eclipse E400 microscope. Photomicrographs were captured  
606 using a SPOT Idea 5.0-megapixel color digital camera and SPOT software.

607 Histopathologic scoring was performed by a board-certified anatomic pathologist  
608 experienced in murine pathology, from 0 (no damage) to 4+ (maximal damage) for alveolar  
609 congestion, hemorrhage, alveolar thickness, neutrophils, and lymphocytic infiltration (85).

610

611 **Cytokine Analysis.** Frozen lung homogenates and serum samples were thawed on ice  
612 and mixed by gentle vortexing. Cytokines in the lungs and serum samples were measured  
613 using Mouse Cytokine 8-Plex Array (Quanterix, Billerica, MA) following the manufacturer's  
614 instructions. Levels in lung supernatants and serum samples were measured using the  
615 Cirascan at the Imager at Tufts University Genomic Core (Boston, MA) and analyzed by  
616 the Cirascan/Cirasoft program. Qlucore Omic Explorer (version 3.5) was used for the  
617 generation of lung cytokine box plots. Concentrations of cytokines (IL-10, IL-2, IL-1 $\beta$ ,  
618 TNF $\alpha$ , IL-6, IFN $\gamma$ , IL-17 and IL-12p70) were log-transformed, and displayed as Log<sub>2</sub> pg/ml.  
619 IFN $\alpha$  was measured using Mouse IFN-alpha ELISA kit (R&D system, MN). following the  
620 manufacturer's instructions.

621

622 **Plaque assay.** Madin-Darby Canine Kidney (MDCK) cells were grown overnight in 12 well  
623 plates at 2x10<sup>5</sup> cells/well in DMEM media +10% FBS. Cells were washed twice with 1xPBS

624 and incubated with serial dilutions of viral inoculum or lung homogenates in DMEM  
625 supplemented with 0.5% low endotoxin BSA (Sigma-Aldrich) for 50 minutes in 37 °C with  
626 5% CO<sub>2</sub> incubator. The plates were shaken every 10 minutes during the incubation and  
627 then washed twice with 1xPBS. 2mL of 2.4% of avicel overlay (FMC) was then added onto  
628 the infected cells and were incubated for 3 days in 37 °C with 5% CO<sub>2</sub> incubator. After 3  
629 days, avicel overlays were removed and cells were washed with 1x PBS and fixed in 4%  
630 paraformaldehyde for 30 minutes at room temperature. 1% crystal violet were then added  
631 for 5 minutes to count plaques.

632

633 **Statistical Analysis.** Statistical analysis was performed using Graph Pad Prism7. CFU  
634 data were log-transformed to normalize distribution. Data are presented as mean values  
635 +/- SEM. Significant differences ( $p < 0.05$ ) were determined by Student's t-test. Differences  
636 in fractions of mice that got sick were measured using Fisher's exact test. Survival  
637 analysis, including the kinetics by which mice succumb to infection, was performed using  
638 the log rank (Mantel-Cox) test. Asterisks indicate significant differences and  $p$  values are  
639 noted in the figures.

640

## 641 **ACKNOWLEDGEMENTS**

642 We would like to acknowledge James Nicholas Lee, Summer Schmalig, and Ognjen  
643 Sekulovic for technical assistance with clinical score, virus preparation and nasal lavage  
644 respectively. We would also like to thank Andrew Camilli for bacterial strains and Marta  
645 Gaglia for protocols. They, along with Tim van Opijnen, Bharathi Sundaresh and Marcia  
646 Osburne provided important feedback on the manuscript.

647

648 **FUNDING**

649 Research reported in this publication was supported by the National Institute On Aging of  
650 the National Institutes of Health under Award Number R21 AG064215 to E.B.G. and F31  
651 AI122615-01A1 to S.R.; King Abdullah Scholarship Program (KASP) implemented by the  
652 Ministry of Higher Education (MOHE) under Award Number 7896504 to B.H.J.

653 **REFERENCES**

- 654 1. Kadioglu A, Weiser JN, Paton JC, Andrew PW. 2008. The role of *Streptococcus*  
655 *pneumoniae* virulence factors in host respiratory colonization and disease. *Nat Rev*  
656 *Microbiol* 6:288-301.
- 657 2. Chao Y, Marks LR, Pettigrew MM, Hakansson AP. 2014. *Streptococcus*  
658 *pneumoniae* biofilm formation and dispersion during colonization and disease. *Front*  
659 *Cell Infect Microbiol* 4:194.
- 660 3. Marks LR, Parameswaran GI, Hakansson AP. 2012. Pneumococcal interactions  
661 with epithelial cells are crucial for optimal biofilm formation and colonization in vitro  
662 and in vivo. *Infect Immun* 80:2744-60.
- 663 4. Marks LR, Davidson BA, Knight PR, Hakansson AP. 2013. Interkingdom signaling  
664 induces *Streptococcus pneumoniae* biofilm dispersion and transition from  
665 asymptomatic colonization to disease. *MBio* 4.
- 666 5. Blanchette-Cain K, Hinojosa CA, Akula Suresh Babu R, Lizcano A, Gonzalez-  
667 Juarbe N, Munoz-Almagro C, Sanchez CJ, Bergman MA, Orihuela CJ. 2013.  
668 *Streptococcus pneumoniae* biofilm formation is strain dependent, multifactorial, and  
669 associated with reduced invasiveness and immunoreactivity during colonization.  
670 *MBio* 4:e00745-13.
- 671 6. Boe DM, Boule LA, Kovacs EJ. 2017. Innate immune responses in the ageing lung.  
672 *Clin Exp Immunol* 187:16-25.
- 673 7. Chong CP, Street PR. 2008. Pneumonia in the elderly: a review of the  
674 epidemiology, pathogenesis, microbiology, and clinical features. *South Med J*  
675 101:1141-5; quiz 1132, 1179.

- 676 8. Bogaert D, De Groot R, Hermans PW. 2004. *Streptococcus pneumoniae*  
677 colonisation: the key to pneumococcal disease. *Lancet Infect Dis* 4:144-54.
- 678 9. Simell B, Auranen K, Kayhty H, Goldblatt D, Dagan R, O'Brien KL, Pneumococcal  
679 Carriage G. 2012. The fundamental link between pneumococcal carriage and  
680 disease. *Expert Rev Vaccines* 11:841-55.
- 681 10. Orsi A, Ansaldi F, Trucchi C, Rosselli R, Icardi G. 2016. *Pneumococcus* and the  
682 Elderly in Italy: A Summary of Available Evidence Regarding Carriage, Clinical  
683 Burden of Lower Respiratory Tract Infections and On-Field Effectiveness of PCV13  
684 Vaccination. *Int J Mol Sci* 17.
- 685 11. Smith EL, Wheeler I, Adler H, Ferreira DM, Sa-Leao R, Abdullahi O, Adetifa I,  
686 Becker-Dreps S, Esposito S, Farida H, Kandasamy R, Mackenzie GA, Nuorti JP,  
687 Nzenze S, Madhi SA, Ortega O, Roca A, Safari D, Schaumburg F, Usuf E, Sanders  
688 EAM, Grant LR, Hammitt LL, O'Brien KL, Gounder P, Bruden DJT, Stanton MC,  
689 Rylance J. 2020. Upper airways colonisation of *Streptococcus pneumoniae* in adults  
690 aged 60 years and older: A systematic review of prevalence and individual  
691 participant data meta-analysis of risk factors. *J Infect* doi:10.1016/j.jinf.2020.06.028.
- 692 12. Regev-Yochay G, Raz M, Dagan R, Porat N, Shainberg B, Pinco E, Keller N,  
693 Rubinstein E. 2004. Nasopharyngeal carriage of *Streptococcus pneumoniae* by  
694 adults and children in community and family settings. *Clin Infect Dis* 38:632-9.
- 695 13. Flamaing J, Peetermans WE, Vandeven J, Verhaegen J. 2010. Pneumococcal  
696 colonization in older persons in a nonoutbreak setting. *J Am Geriatr Soc* 58:396-8.
- 697 14. Palmu AA, Kaijalainen T, Saukkoriipi A, Leinonen M, Kilpi TM. 2012.  
698 Nasopharyngeal carriage of *Streptococcus pneumoniae* and pneumococcal urine  
699 antigen test in healthy elderly subjects. *Scand J Infect Dis* 44:433-8.

- 700 15. van Deursen AMM, van Houten MA, Webber C, Patton M, Scott D, Patterson S,  
701 Jiang Q, Gruber WC, Schmoele-Thoma B, Grobbee DE, Bonten MJM, Sanders  
702 EAM. 2018. The Impact of the 13-Valent Pneumococcal Conjugate Vaccine on  
703 Pneumococcal Carriage in the Community Acquired Pneumonia Immunization Trial  
704 in Adults (CAPiTA) Study. *Clin Infect Dis* 67:42-49.
- 705 16. Esposito S, Mari D, Bergamaschini L, Orenti A, Terranova L, Ruggiero L, Ierardi V,  
706 Gambino M, Croce FD, Principi N. 2016. Pneumococcal colonization in older adults.  
707 *Immun Ageing* 13:2.
- 708 17. van Deursen AM, van den Bergh MR, Sanders EA, Carriage Pilot Study G. 2016.  
709 Carriage of *Streptococcus pneumoniae* in asymptomatic, community-dwelling  
710 elderly in the Netherlands. *Vaccine* 34:4-6.
- 711 18. Krone CL, van de Groep K, Trzcinski K, Sanders EA, Bogaert D. 2014.  
712 Immunosenescence and pneumococcal disease: an imbalance in host-pathogen  
713 interactions. *Lancet Respir Med* 2:141-53.
- 714 19. Bou Ghanem EN, Clark S, Du X, Wu D, Camilli A, Leong JM, Meydani SN. 2015.  
715 The alpha-tocopherol form of vitamin E reverses age-associated susceptibility to  
716 streptococcus pneumoniae lung infection by modulating pulmonary neutrophil  
717 recruitment. *J Immunol* 194:1090-9.
- 718 20. Bou Ghanem EN, Clark S, Roggensack SE, McIver SR, Alcaide P, Haydon PG,  
719 Leong JM. 2015. Extracellular Adenosine Protects against *Streptococcus*  
720 pneumoniae Lung Infection by Regulating Pulmonary Neutrophil Recruitment. *PLoS*  
721 *Pathog* 11:e1005126.
- 722 21. Garvy BA, Harmsen AG. 1996. The importance of neutrophils in resistance to  
723 pneumococcal pneumonia in adult and neonatal mice. *Inflammation* 20:499-512.

- 724 22. Hahn I, Klaus A, Janze AK, Steinwede K, Ding N, Bohling J, Brumshagen C,  
725 Serrano H, Gauthier F, Paton JC, Welte T, Maus UA. 2011. Cathepsin G and  
726 neutrophil elastase play critical and nonredundant roles in lung-protective immunity  
727 against *Streptococcus pneumoniae* in mice. *Infect Immun* 79:4893-901.
- 728 23. Simell B, Vuorela A, Ekstrom N, Palmu A, Reunanen A, Meri S, Kayhty H,  
729 Vakevainen M. 2011. Aging reduces the functionality of anti-pneumococcal  
730 antibodies and the killing of *Streptococcus pneumoniae* by neutrophil phagocytosis.  
731 *Vaccine* 29:1929-34.
- 732 24. Bhalla M SS, Abamonte A, Herring SE, Roggensack SE, Bou Ghanem EN. 2020.  
733 Extracellular adenosine signaling reverses the age-driven decline in the ability of  
734 neutrophils to kill *S. pneumoniae*. doi:<https://doi.org/10.1101/2020.04.14.041418>.
- 735 25. Pignatti P, Ragnoli B, Radaeli A, Moscato G, Malerba M. 2011. Age-related  
736 increase of airway neutrophils in older healthy nonsmoking subjects. *Rejuvenation*  
737 *Res* 14:365-70.
- 738 26. Menter T, Giefing-Kroell C, Grubeck-Loebenstien B, Tzankov A. 2014.  
739 Characterization of the inflammatory infiltrate in *Streptococcus pneumoniae*  
740 pneumonia in young and elderly patients. *Pathobiology* 81:160-7.
- 741 27. Bhowmick R, Tin Maung NH, Hurley BP, Ghanem EB, Gronert K, McCormick BA,  
742 Leong JM. 2013. Systemic disease during *Streptococcus pneumoniae* acute lung  
743 infection requires 12-lipoxygenase-dependent inflammation. *J Immunol* 191:5115-  
744 23.
- 745 28. Rudra Bhowmick NM, Bryan Hurley, Karsten Gronert, Beth McCormick and John  
746 Leong. 2012. Systemic disease during *Streptococcus pneumoniae* lung infection is  
747 facilitated by hepoxilin A3 mediated neutrophil recruitment, Submitted, In revision.



- 748 29. Bakaletz LO. 2017. Viral-bacterial co-infections in the respiratory tract. *Curr Opin*  
749 *Microbiol* 35:30-35.
- 750 30. McCullers JA. 2006. Insights into the interaction between influenza virus and  
751 pneumococcus. *Clin Microbiol Rev* 19:571-82.
- 752 31. Chertow DS, Memoli MJ. 2013. Bacterial coinfection in influenza: a grand rounds  
753 review. *JAMA* 309:275-82.
- 754 32. Centers for Disease C, Prevention. 2010. Estimates of deaths associated with  
755 seasonal influenza --- United States, 1976-2007. *MMWR Morb Mortal Wkly Rep*  
756 59:1057-62.
- 757 33. Shrestha S, Foxman B, Weinberger DM, Steiner C, Viboud C, Rohani P. 2013.  
758 Identifying the interaction between influenza and pneumococcal pneumonia using  
759 incidence data. *Sci Transl Med* 5:191ra84.
- 760 34. McCullers JA. 2014. The co-pathogenesis of influenza viruses with bacteria in the  
761 lung. *Nat Rev Microbiol* 12:252-62.
- 762 35. Palacios G, Hornig M, Cisterna D, Savji N, Bussetti AV, Kapoor V, Hui J, Tokarz R,  
763 Briese T, Baumeister E, Lipkin WI. 2009. *Streptococcus pneumoniae* coinfection is  
764 correlated with the severity of H1N1 pandemic influenza. *PLoS One* 4:e8540.
- 765 36. Dhanoa A, Fang NC, Hassan SS, Kaniappan P, Rajasekaram G. 2011.  
766 Epidemiology and clinical characteristics of hospitalized patients with pandemic  
767 influenza A (H1N1) 2009 infections: the effects of bacterial coinfection. *Virology*  
768 8:501.
- 769 37. Siegel SJ, Roche AM, Weiser JN. 2014. Influenza promotes pneumococcal growth  
770 during coinfection by providing host sialylated substrates as a nutrient source. *Cell*  
771 *Host Microbe* 16:55-67.

- 772 38. Rowe HM, Meliopoulos VA, Iverson A, Bomme P, Schultz-Cherry S, Rosch JW.  
773 2019. Direct interactions with influenza promote bacterial adherence during  
774 respiratory infections. *Nat Microbiol* 4:1328-1336.
- 775 39. Diavatopoulos DA, Short KR, Price JT, Wilksch JJ, Brown LE, Briles DE, Strugnell  
776 RA, Wijburg OL. 2010. Influenza A virus facilitates *Streptococcus pneumoniae*  
777 transmission and disease. *FASEB J* 24:1789-98.
- 778 40. Reddinger RM, Luke-Marshall NR, Sauberan SL, Hakansson AP, Campagnari AA.  
779 2018. *Streptococcus pneumoniae* Modulates *Staphylococcus aureus* Biofilm  
780 Dispersion and the Transition from Colonization to Invasive Disease. *MBio* 9.
- 781 41. McCullers JA, Rehg JE. 2002. Lethal synergism between influenza virus and  
782 *Streptococcus pneumoniae*: characterization of a mouse model and the role of  
783 platelet-activating factor receptor. *J Infect Dis* 186:341-50.
- 784 42. Levandowski RA, Gerrity TR, Garrard CS. 1985. Modifications of lung clearance  
785 mechanisms by acute influenza A infection. *J Lab Clin Med* 106:428-32.
- 786 43. Pittet LA, Hall-Stoodley L, Rutkowski MR, Harmsen AG. 2010. Influenza virus  
787 infection decreases tracheal mucociliary velocity and clearance of *Streptococcus*  
788 *pneumoniae*. *Am J Respir Cell Mol Biol* 42:450-60.
- 789 44. McCullers JA, Bartmess KC. 2003. Role of neuraminidase in lethal synergism  
790 between influenza virus and *Streptococcus pneumoniae*. *J Infect Dis* 187:1000-9.
- 791 45. Smith AM, McCullers JA. 2014. Secondary bacterial infections in influenza virus  
792 infection pathogenesis. *Curr Top Microbiol Immunol* 385:327-56.
- 793 46. Cundell DR, Gerard NP, Gerard C, Idanpaan-Heikkila I, Tuomanen EI. 1995.  
794 *Streptococcus pneumoniae* anchor to activated human cells by the receptor for  
795 platelet-activating factor. *Nature* 377:435-8.

- 796 47. Ballinger MN, Standiford TJ. 2010. Postinfluenza bacterial pneumonia: host  
797 defenses gone awry. *J Interferon Cytokine Res* 30:643-52.
- 798 48. Metzger DW, Sun K. 2013. Immune dysfunction and bacterial coinfections following  
799 influenza. *J Immunol* 191:2047-52.
- 800 49. Sun K, Metzger DW. 2008. Inhibition of pulmonary antibacterial defense by  
801 interferon-gamma during recovery from influenza infection. *Nat Med* 14:558-64.
- 802 50. Nakamura S, Davis KM, Weiser JN. 2011. Synergistic stimulation of type I  
803 interferons during influenza virus coinfection promotes *Streptococcus pneumoniae*  
804 colonization in mice. *J Clin Invest* 121:3657-65.
- 805 51. Cho SJ, Plataki M, Mitzel D, Lowry G, Rooney K, Stout-Delgado H. 2018.  
806 Decreased NLRP3 inflammasome expression in aged lung may contribute to  
807 increased susceptibility to secondary *Streptococcus pneumoniae* infection. *Exp*  
808 *Gerontol* 105:40-46.
- 809 52. <https://www.cdc.gov/flu/about/burden/index.html>. 2018. Disease Burden of  
810 Influenza <https://www.cdc.gov/flu/about/burden/index.html>, on CENTERS FOR  
811 DISEASE CONTROL AND PREVENTION.  
812 <https://www.cdc.gov/flu/about/burden/index.html>. Accessed
- 813 53. Krone CL, Wyllie AL, van Beek J, Rots NY, Oja AE, Chu ML, Bruin JP, Bogaert D,  
814 Sanders EA, Trzcinski K. 2015. Carriage of *Streptococcus pneumoniae* in aged  
815 adults with influenza-like-illness. *PLoS One* 10:e0119875.
- 816 54. Rello J, Pop-Vicas A. 2009. Clinical review: primary influenza viral pneumonia. *Crit*  
817 *Care* 13:235.
- 818 55. Torres A, Loeches IM, Sligl W, Lee N. 2020. Severe flu management: a point of  
819 view. *Intensive Care Med* 46:153-162.

- 820 56. Aaberge IS, Eng J, Lermark G, Lovik M. 1995. Virulence of *Streptococcus*  
821 *pneumoniae* in mice: a standardized method for preparation and frozen storage of  
822 the experimental bacterial inoculum. *Microb Pathog* 18:141-52.
- 823 57. Tettelin H, Nelson KE, Paulsen IT, Eisen JA, Read TD, Peterson S, Heidelberg J,  
824 DeBoy RT, Haft DH, Dodson RJ, Durkin AS, Gwinn M, Kolonay JF, Nelson WC,  
825 Peterson JD, Umayam LA, White O, Salzberg SL, Lewis MR, Radune D, Holtzapple  
826 E, Khouri H, Wolf AM, Utterback TR, Hansen CL, McDonald LA, Feldblyum TV,  
827 Angiuoli S, Dickinson T, Hickey EK, Holt IE, Loftus BJ, Yang F, Smith HO, Venter  
828 JC, Dougherty BA, Morrison DA, Hollingshead SK, Fraser CM. 2001. Complete  
829 genome sequence of a virulent isolate of *Streptococcus pneumoniae*. *Science*  
830 293:498-506.
- 831 58. Bou Ghanem EN, Maung NHT, Siwapornchai N, Goodwin AE, Clark S, Munoz-Elias  
832 EJ, Camilli A, Gerstein RM, Leong JM. 2018. Nasopharyngeal Exposure to  
833 *Streptococcus pneumoniae* Induces Extended Age-Dependent Protection against  
834 Pulmonary Infection Mediated by Antibodies and CD138(+) Cells. *J Immunol*  
835 200:3739-3751.
- 836 59. Bhalla M, Hui Yeoh J, Lamneck C, Herring SE, Tchalla EYI, Heinzinger LR, Leong  
837 JM, Bou Ghanem EN. 2020. A1 adenosine receptor signaling reduces  
838 *Streptococcus pneumoniae* adherence to pulmonary epithelial cells by targeting  
839 expression of platelet-activating factor receptor. *Cell Microbiol* 22:e13141.
- 840 60. Boyd AR, Shivshankar P, Jiang S, Berton MT, Orihuela CJ. 2012. Age-related  
841 defects in TLR2 signaling diminish the cytokine response by alveolar macrophages  
842 during murine pneumococcal pneumonia. *Exp Gerontol* 47:507-18.

- 843 61. Thevaranjan N, Puchta A, Schulz C, Naidoo A, Szamosi JC, Verschoor CP, Loukov  
844 D, Schenck LP, Jury J, Foley KP, Schertzer JD, Larche MJ, Davidson DJ, Verdu  
845 EF, Surette MG, Bowdish DME. 2018. Age-Associated Microbial Dysbiosis  
846 Promotes Intestinal Permeability, Systemic Inflammation, and Macrophage  
847 Dysfunction. *Cell Host Microbe* 23:570.
- 848 62. McNamee LA, Harmsen AG. 2006. Both influenza-induced neutrophil dysfunction  
849 and neutrophil-independent mechanisms contribute to increased susceptibility to a  
850 secondary *Streptococcus pneumoniae* infection. *Infect Immun* 74:6707-21.
- 851 63. Bou Ghanem EN, Lee JN, Joma BH, Meydani SN, Leong JM, Panda A. 2017. The  
852 Alpha-Tocopherol Form of Vitamin E Boosts Elastase Activity of Human PMNs and  
853 Their Ability to Kill *Streptococcus pneumoniae*. *Front Cell Infect Microbiol* 7:161.
- 854 64. Wu W, Metcalf JP. 2020. The Role of Type I IFNs in Influenza: Antiviral  
855 Superheroes or Immunopathogenic Villains? *J Innate Immun* 12:437-447.
- 856 65. Wagenvoort GH, Sanders EA, Vlaminckx BJ, de Melker HE, van der Ende A, Knol  
857 MJ. 2017. Sex differences in invasive pneumococcal disease and the impact of  
858 pneumococcal conjugate vaccination in the Netherlands, 2004 to 2015. *Euro*  
859 *Surveill* 22.
- 860 66. Gutierrez F, Masia M, Mirete C, Soldan B, Rodriguez JC, Padilla S, Hernandez I,  
861 Royo G, Martin-Hidalgo A. 2006. The influence of age and gender on the  
862 population-based incidence of community-acquired pneumonia caused by different  
863 microbial pathogens. *J Infect* 53:166-74.
- 864 67. Greene CJ, Marks LR, Hu JC, Reddinger R, Mandell L, Roche-Hakansson H, King-  
865 Lyons ND, Connell TD, Hakansson AP. 2016. Novel Strategy To Protect against

- 866 Influenza Virus-Induced Pneumococcal Disease without Interfering with Commensal  
867 Colonization. *Infect Immun* 84:1693-1703.
- 868 68. Mina MJ, Klugman KP, McCullers JA. 2013. Live attenuated influenza vaccine, but  
869 not pneumococcal conjugate vaccine, protects against increased density and  
870 duration of pneumococcal carriage after influenza infection in pneumococcal  
871 colonized mice. *J Infect Dis* 208:1281-5.
- 872 69. Wadowsky RM, Mietzner SM, Skoner DP, Doyle WJ, Fireman P. 1995. Effect of  
873 experimental influenza A virus infection on isolation of *Streptococcus pneumoniae*  
874 and other aerobic bacteria from the oropharynges of allergic and nonallergic adult  
875 subjects. *Infect Immun* 63:1153-7.
- 876 70. Jochems SP, Marcon F, Carniel BF, Holloway M, Mitsi E, Smith E, Gritzfeld JF,  
877 Solorzano C, Reine J, Pojar S, Nikolaou E, German EL, Hyder-Wright A, Hill H,  
878 Hales C, de Steenhuijsen Piters WAA, Bogaert D, Adler H, Zaidi S, Connor V,  
879 Gordon SB, Rylance J, Nakaya HI, Ferreira DM. 2018. Inflammation induced by  
880 influenza virus impairs human innate immune control of pneumococcus. *Nat*  
881 *Immunol* 19:1299-1308.
- 882 71. Stout-Delgado HW, Vaughan SE, Shirali AC, Jaramillo RJ, Harrod KS. 2012.  
883 Impaired NLRP3 inflammasome function in elderly mice during influenza infection is  
884 rescued by treatment with nigericin. *J Immunol* 188:2815-24.
- 885 72. Gay R, Han SN, Marko M, Belisle S, Bronson R, Meydani SN. 2004. The effect of  
886 vitamin E on secondary bacterial infection after influenza infection in young and old  
887 mice. *Ann N Y Acad Sci* 1031:418-21.

- 888 73. Smith MW, Schmidt JE, Rehg JE, Orihuela CJ, McCullers JA. 2007. Induction of  
889 pro- and anti-inflammatory molecules in a mouse model of pneumococcal  
890 pneumonia after influenza. *Comp Med* 57:82-9.
- 891 74. McNeela EA, Burke A, Neill DR, Baxter C, Fernandes VE, Ferreira D, Smeaton S,  
892 El-Rachkidy R, McLoughlin RM, Mori A, Moran B, Fitzgerald KA, Tschopp J, Petrilli  
893 V, Andrew PW, Kadioglu A, Lavelle EC. 2010. Pneumolysin activates the NLRP3  
894 inflammasome and promotes proinflammatory cytokines independently of TLR4.  
895 *PLoS Pathog* 6:e1001191.
- 896 75. Pettigrew MM, Marks LR, Kong Y, Gent JF, Roche-Hakansson H, Hakansson AP.  
897 2014. Dynamic changes in the *Streptococcus pneumoniae* transcriptome during  
898 transition from biofilm formation to invasive disease upon influenza A virus infection.  
899 *Infect Immun* 82:4607-19.
- 900 76. Siwapornchai N, Lee JN, Tchalla EYI, Bhalla M, Yeoh JH, Roggensack SE, Leong  
901 JM, Bou Ghanem EN. 2020. Extracellular adenosine enhances the ability of PMNs  
902 to kill *Streptococcus pneumoniae* by inhibiting IL-10 production. *J Leukoc Biol*  
903 doi:10.1002/JLB.4MA0120-115RR.
- 904 77. Short KR, Reading PC, Wang N, Diavatopoulos DA, Wijburg OL. 2012. Increased  
905 nasopharyngeal bacterial titers and local inflammation facilitate transmission of  
906 *Streptococcus pneumoniae*. *MBio* 3.
- 907 78. Kulkarni U, Zemans RL, Smith CA, Wood SC, Deng JC, Goldstein DR. 2019.  
908 Excessive neutrophil levels in the lung underlie the age-associated increase in  
909 influenza mortality. *Mucosal Immunol* 12:545-554.
- 910 79. van der Sluijs KF, van Elden LJ, Nijhuis M, Schuurman R, Pater JM, Florquin S,  
911 Goldman M, Jansen HM, Lutter R, van der Poll T. 2004. IL-10 is an important

- 912 mediator of the enhanced susceptibility to pneumococcal pneumonia after influenza  
913 infection. *J Immunol* 172:7603-9.
- 914 80. Feng E, Balint E, Poznanski SM, Ashkar AA, Loeb M. 2021. Aging and Interferons:  
915 Impacts on Inflammation and Viral Disease Outcomes. *Cells* 10.
- 916 81. Rowe HM, Livingston B, Margolis E, Davis A, Meliopoulos VA, Echlin H, Schultz-  
917 Cherry S, Rosch JW. 2020. Respiratory Bacteria Stabilize and Promote Airborne  
918 Transmission of Influenza A Virus. *mSystems* 5.
- 919 82. Nguyen DT, Louwen R, Elberse K, van Amerongen G, Yuksel S, Luijendijk A,  
920 Osterhaus AD, Duprex WP, de Swart RL. 2015. *Streptococcus pneumoniae*  
921 Enhances Human Respiratory Syncytial Virus Infection In Vitro and In Vivo. *PLoS*  
922 *One* 10:e0127098.
- 923 83. Carniel BF, Marcon F, Rylance J, German EL, Zaidi S, Reine J, Negera E, Nikolaou  
924 E, Pojar S, Solorzano C, Collins AM, Connor V, Bogaert D, Gordon SB, Nakaya HI,  
925 Ferreira DM, Jochems SP, Mitsi E. 2021. Pneumococcal colonization impairs  
926 mucosal immune responses to live attenuated influenza vaccine. *JCI Insight* 6.
- 927 84. Swamydas M, Lionakis MS. 2013. Isolation, purification and labeling of mouse bone  
928 marrow neutrophils for functional studies and adoptive transfer experiments. *J Vis*  
929 *Exp* doi:10.3791/50586:e50586.
- 930 85. Nishina K, Mikawa K, Takao Y, Shiga M, Maekawa N, Obara H. 1998. Intravenous  
931 lidocaine attenuates acute lung injury induced by hydrochloric acid aspiration in  
932 rabbits. *Anesthesiology* 88:1300-9.

933

934

935



936 **FIGURE LEGENDS**

937 **Figure 1. Combined intranasal/intratracheal IAV inoculation of *S. pneumoniae*-**

938 **colonized mice results in bacterial dissemination and disease.** (A) Timeline of co-

939 infection; 8-10 weeks old male C57BL/6 (B6) mice were inoculated i.n. with  $5 \times 10^6$  CFU of

940 biofilm grown *S. pneumoniae* TIGR4 to establish colonization in the nasopharynx. 48 hours

941 later, the mice were either mock treated (*Sp*) or received 500 PFU of Influenza A virus PR8

942 (IAV) i.n. and 20 PFU i.t. (B) Percent weight loss was monitored daily. (C) Blinded clinical

943 scoring was performed on day 2 and day 4 post IAV infection. The percentages denote the

944 number of sick mice observed over total number of mice. A score of 0 means no sign of

945 sickness observed and a score above 1 indicates observable sickness. (D) Survival was

946 monitored for 8 days post IAV infection with fractions denoting survivors over total number

947 of mice. (E) The bacterial burden in the nasopharynx and lung were determined at day 2

948 post IAV infection. Pooled data from four separate experiments are shown in which one

949 group of twelve mice in each experimental condition were monitored over time and another

950 group of 6 mice per experimental condition were used for measuring bacterial burden.

951 Statistically significant differences determined by Student's t-test for bacterial burden and

952 clinical score and the log-rank (Mantel-Cox) test for survival are indicated by asterisks. #,

953 indicates statistical significance ( $p < 0.05$ ) between *Sp* and *Sp*+IAV groups by Fisher's

954 exact test.

955

956 **Figure 2. PMN depletion may have a small effect on the course of disease during**

957 **IAV/*S. pneumoniae* co-infection.** 8-10 weeks old C57BL/6 mice were intraperitoneally

958 (i.p.) injected with anti-Ly6G (clone 1A8) antibodies to deplete neutrophils or mock treated.

959 The antibodies were given daily from day -3 to day 1, and every other day from day 3 to

960 the end of each experiment (with respect to IAV-infection). (A) At 18 and 48 hours post IAV  
961 infection, bacterial numbers in the nasal wash and lungs were determined. Pooled data  
962 from three separate experiments with a total of n=6 mice per experimental condition at 18h  
963 and n=9 mice per condition at 48h are shown. Bacteremia (B) and weight loss (C) was  
964 monitored over time. (D) Mice were blindly scored for symptoms of diseases at 18 and 48  
965 hours post IAV-infection. The percentages indicate number of mice with clinical sickness  
966 (clinical score above 1). (E) Survival was monitored over time where the fractions denote  
967 survivors over total number of mice at 8 days post IAV infection. (C-E) Data are pooled  
968 from three separate experiments with n=16 mice per group. Statistically significant  
969 differences were determined by Student's t-test for bacterial burden and clinical score and  
970 the log-rank (Mantel-Cox) and *ns* = not significant

971

972 **Figure 3. Aging increases susceptibility to IAV/*S. pneumoniae* co-infection.** Young  
973 (8-10 weeks) and aged (18-24 months) C57BL/6 male mice were co-infected with *S.*  
974 *pneumoniae* TIGR4 i.n. and Influenza A virus PR8 i.n. and i.t. (as in Figure 1A). (A) Clinical  
975 score of co-infected young and aged mice at day 2 post IAV-infection is shown; the  
976 percentage of mice with demonstrable illness is indicated. #, indicate statistical  
977 significance by Fisher's exact test. (B) Survival of co-infected young and aged mice were  
978 monitored over time with fractions denoting survivors over total of mice. Data are pooled  
979 from four experiments with n=14 mice per group. Asterisks indicate statistical significance  
980 by the log-rank (Mantel-Cox) test. (C-E) Bacterial burdens in the nasal wash, lungs, and  
981 blood were determined at 18 and 48 hours post IAV inoculation. The mean +/- SEM pooled  
982 from three separate experiments are shown with n=7 mice per condition at 18h and n=10  
983 mice per condition at 48h. LOD denotes the limit of detection. For clinical score (A), data

984 shown are pooled from all mice from experiments shown in (B) and (C-E) that had survived  
985 up to that timepoint (i.e., n= 13 for old and n= 16 for young).

986

987 **Figure 4. Aging is associated with more rapid lung inflammation.** Young and aged  
988 C57BL/6 male mice were co-infected with *S. pneumoniae* and Influenza A virus PR8. 18  
989 and 48 hours following IAV-infection (see experimental design in Fig. 1A), the lungs were  
990 harvested. (A) Lungs were stained with Hematoxylin and Eosin and shown are  
991 representative photographs at 100x or 400X (in inset). (B) Cytokines in the supernatants of  
992 lung homogenates of young (n=4) or aged (n=5) mice at 18 hours post co-infection were  
993 measured by multiplex ELISA. Asterisks represent statistical significance by Student's t-  
994 test. (C) The percentages and total number of PMNs (Ly6G+) in the lungs was measured  
995 by flow cytometry. Young mice are represented by open bars and aged mice by shaded  
996 bars. The mean +/- SEM pooled from three separate experiments are shown where data  
997 are pooled from twelve mice per age group, except for 48h post-co-infection, where due to  
998 the kinetics of disease, data from only 7 surviving old mice are shown. Statistically  
999 significant differences determined by Student's t-test are indicated by asterisks.

1000

1001 **Figure 5. Aging and IAV infection diminish the ability of PMNs to kill *S. pneumoniae***  
1002 ***ex vivo*.** PMNs were isolated from bone marrow of young (8-10 weeks) and aged (18-24  
1003 months) C57BL/6 male mice that were mock-infected (uninf.) or singly infected with IAV  
1004 (i.n. + i.t.) for 2 days. PMNs were incubated with *S. pneumoniae* pre-opsonized with  
1005 homologous sera from the same mouse for 45 or 90 minutes at 37°C. The percentages of  
1006 *S. pneumoniae* killed upon incubation with PMNs were determined with respect to a no  
1007 PMN control. Data shown represent the means +/- SEM pooled from two experiments (n=3

1008 mice per group per timepoint) where each condition was tested in quadruplicates per  
1009 experiment. Asterisks represent statistical significance as determined by Student's t-test.

1010

1011 **Figure 6. Aging and prior colonization with *S. pneumoniae* result in impaired IFN- $\alpha$**   
1012 **production and higher viral burden in the lungs.** Young and aged C57BL/6 male mice  
1013 were either co-infected with *S. pneumoniae* and Influenza A virus PR8 (*Sp* + IAV),  
1014 challenged with virus alone (IAV) or mock challenged with PBS (uninfected) (as in Figure  
1015 1A). Two days post IAV-infection, (A) viral burdens in the lungs were determined and (B)  
1016 levels of IFN- $\alpha$  in the supernatants of lung homogenates were measured by ELISA. Data  
1017 from n=4 mice per group are shown. Statistically significant differences were determined  
1018 by Student's t-test.



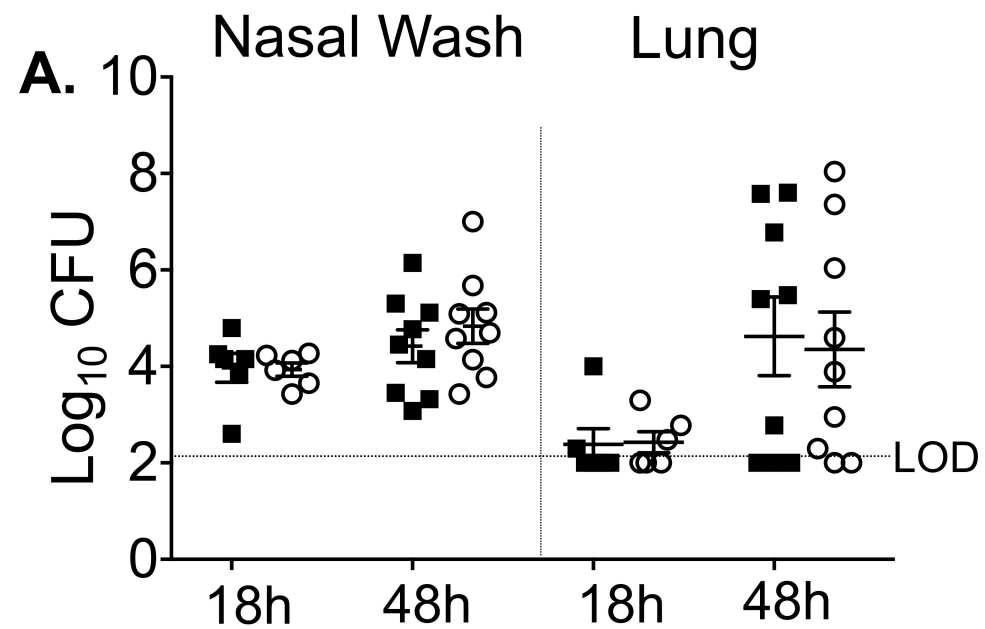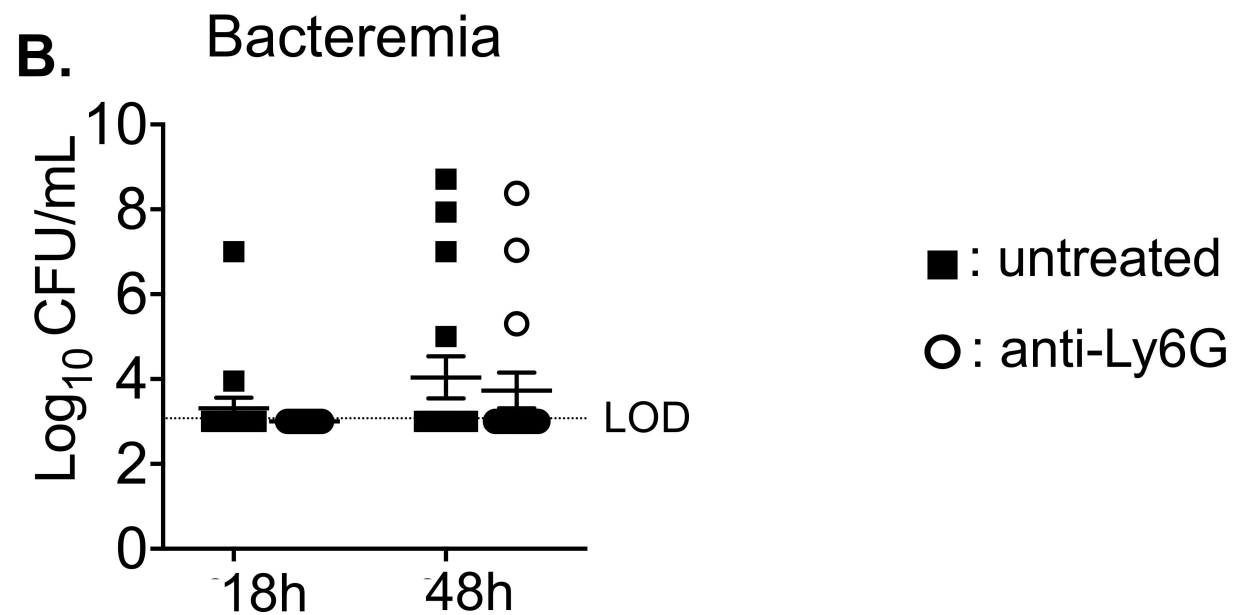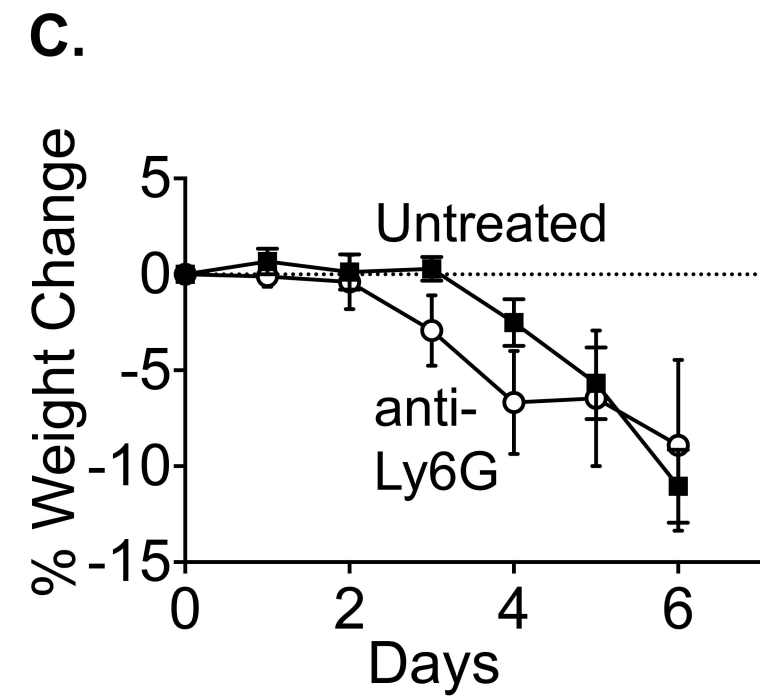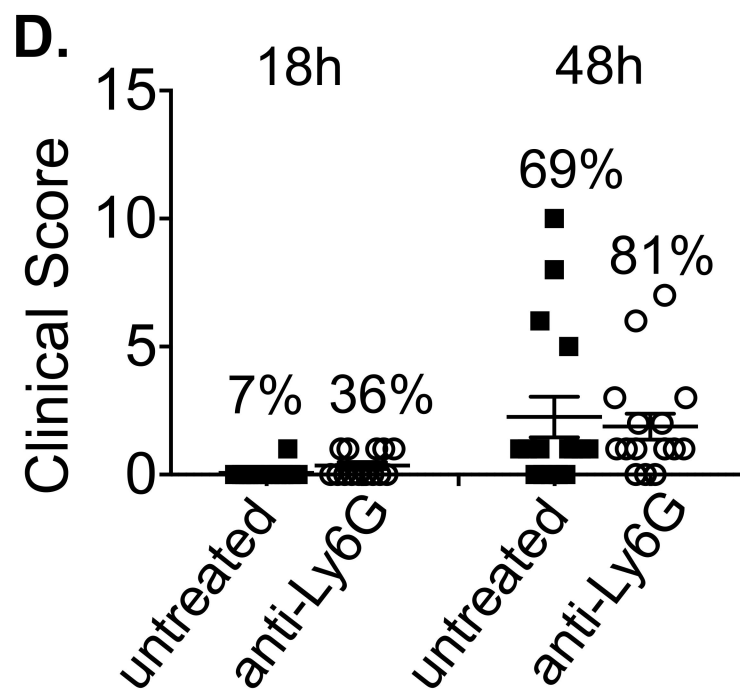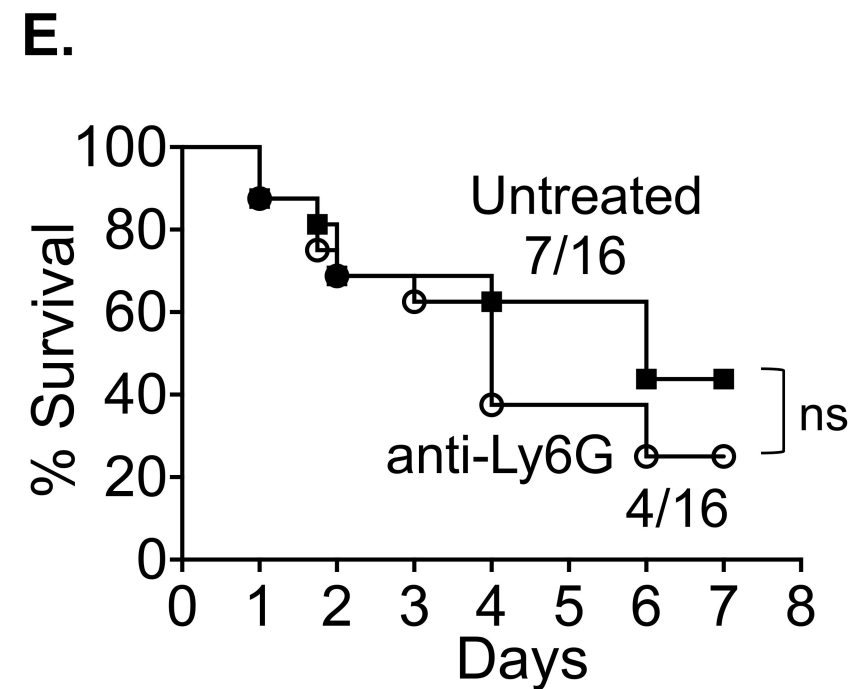

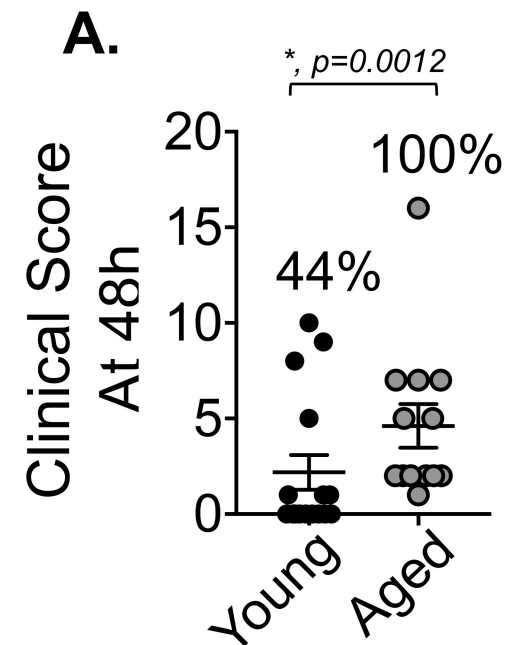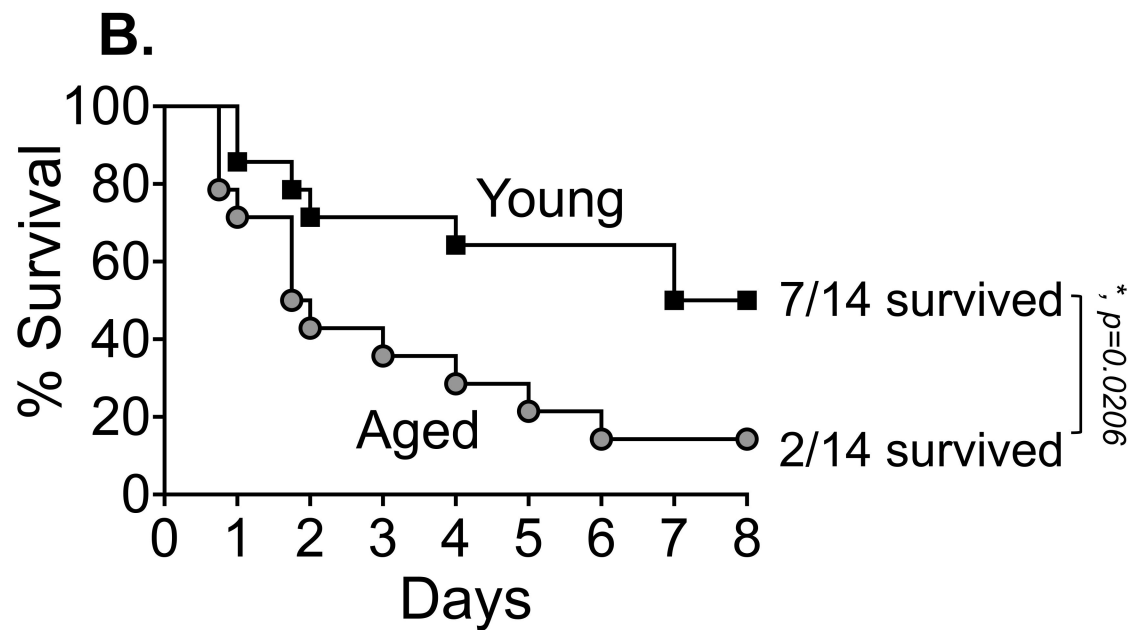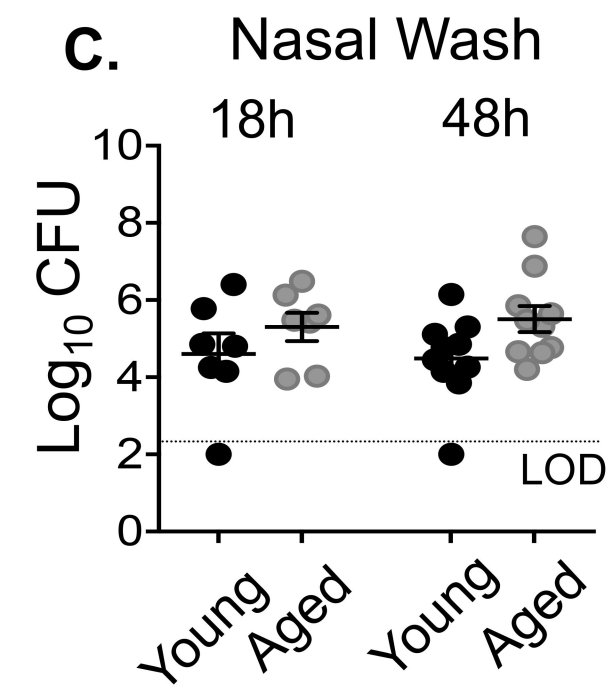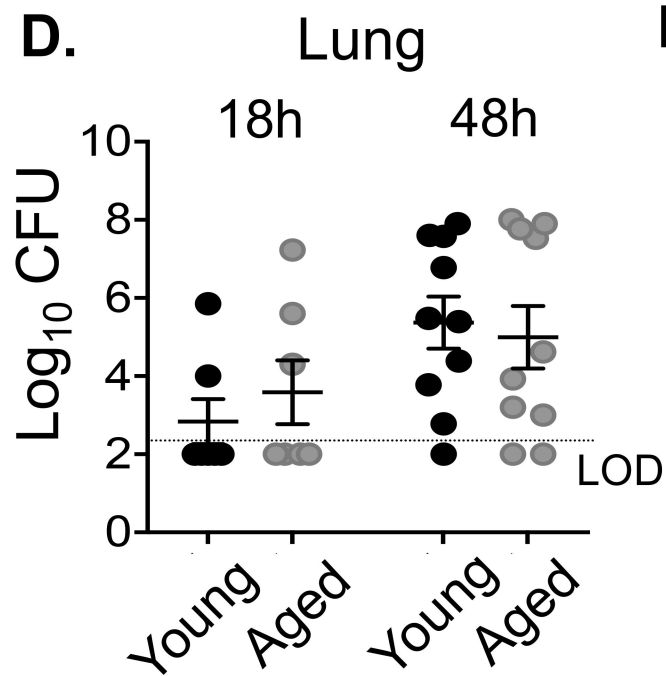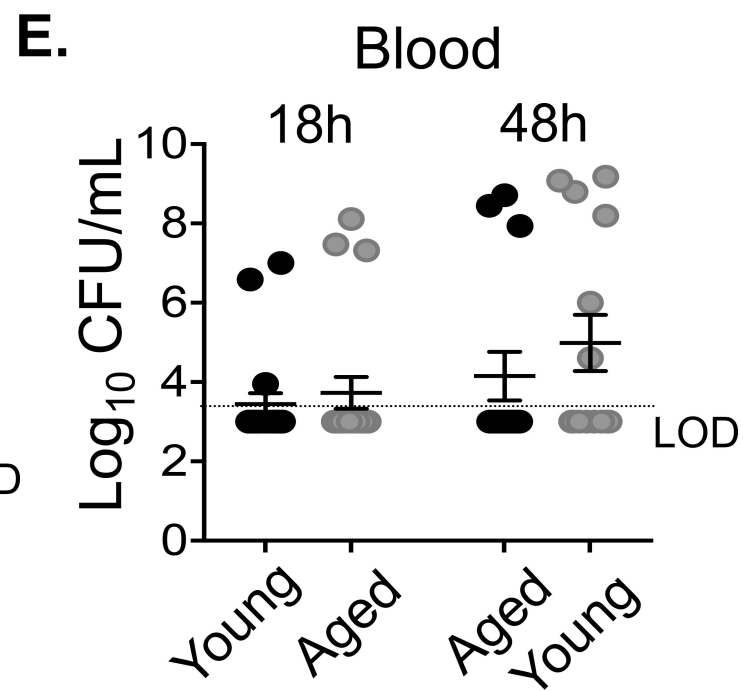



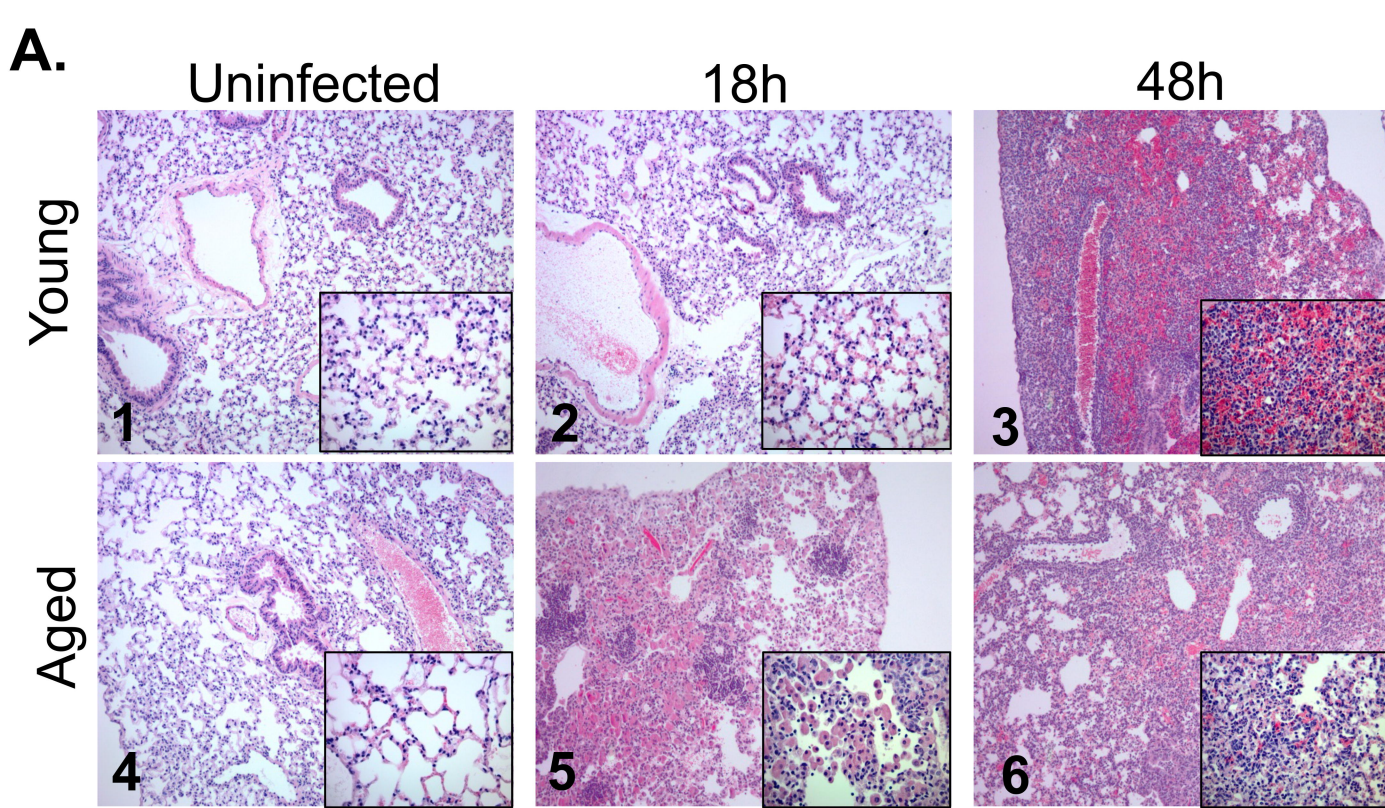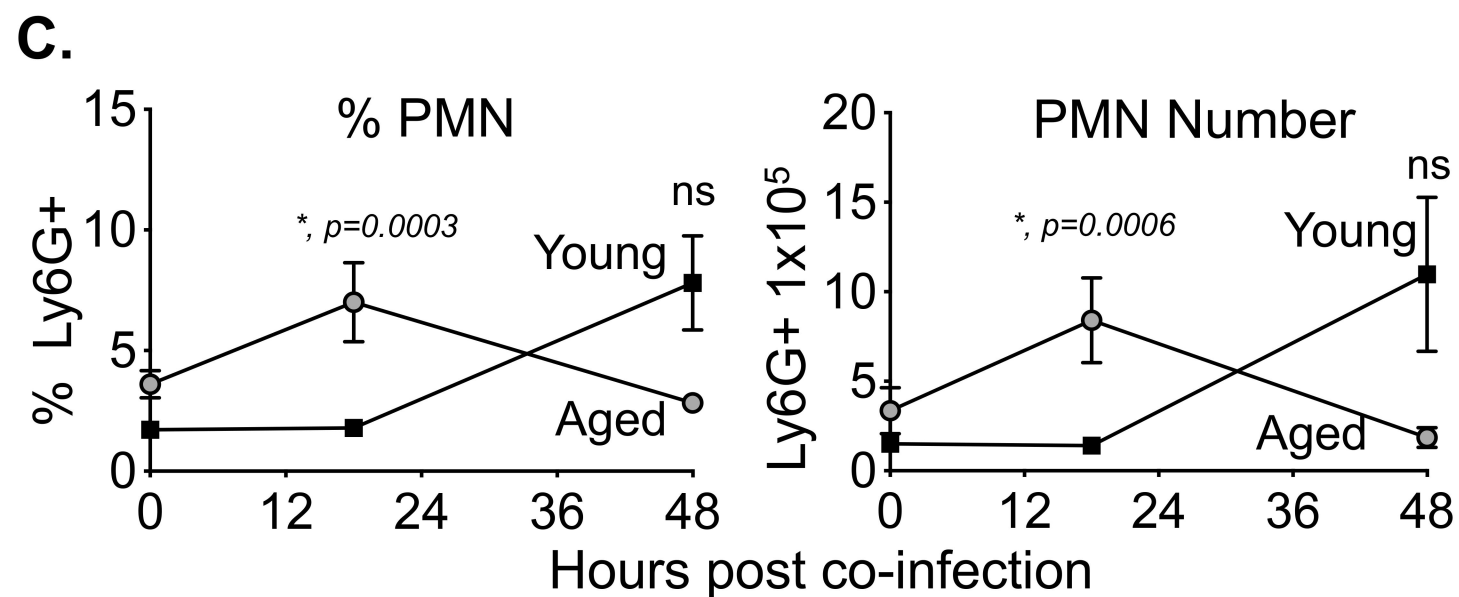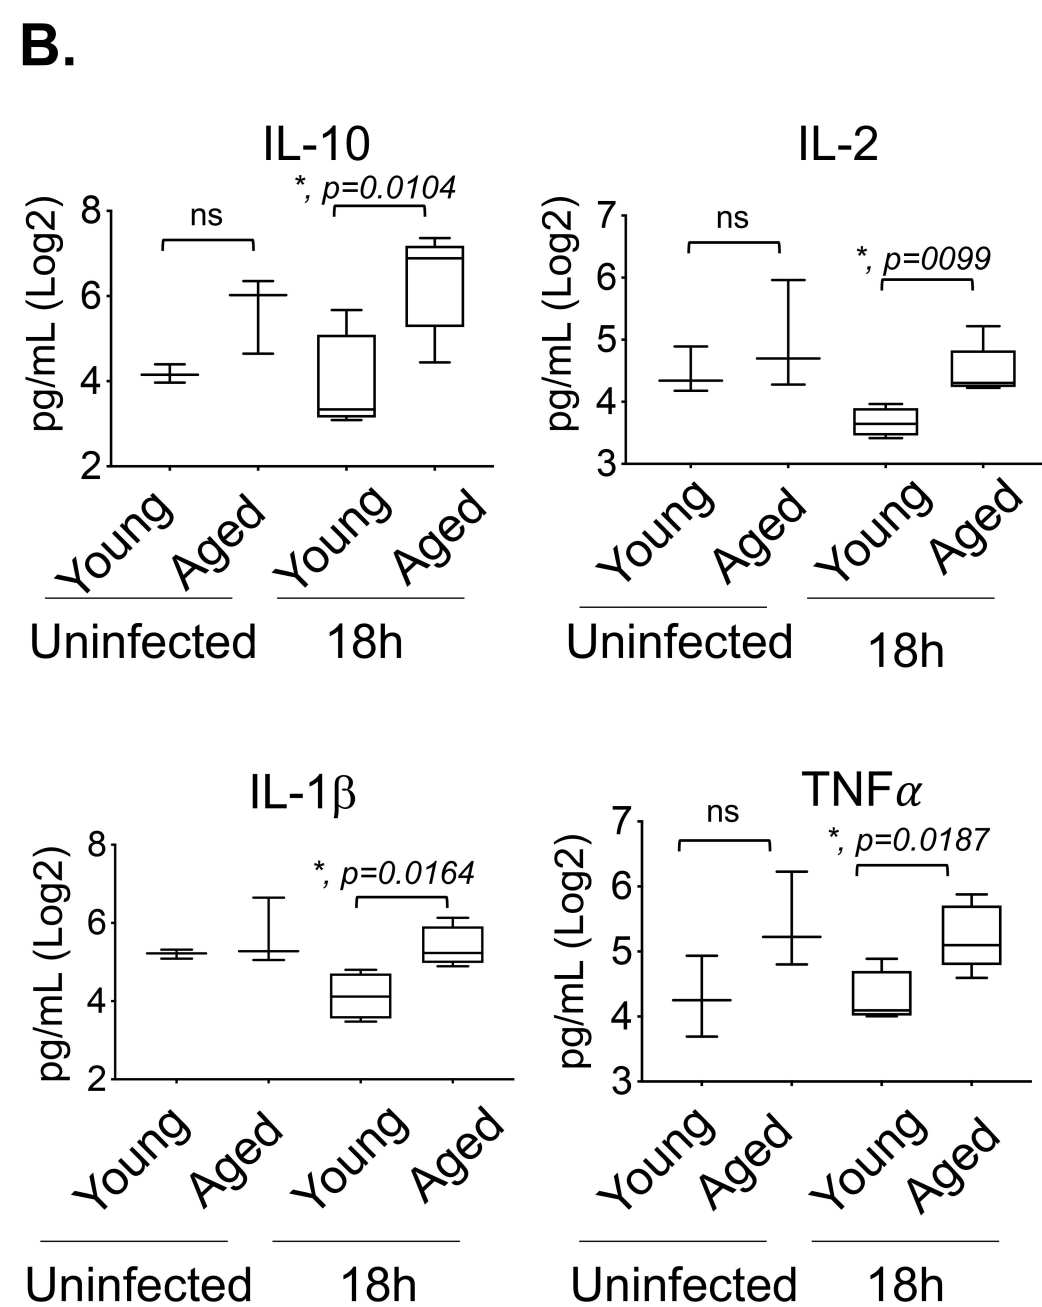



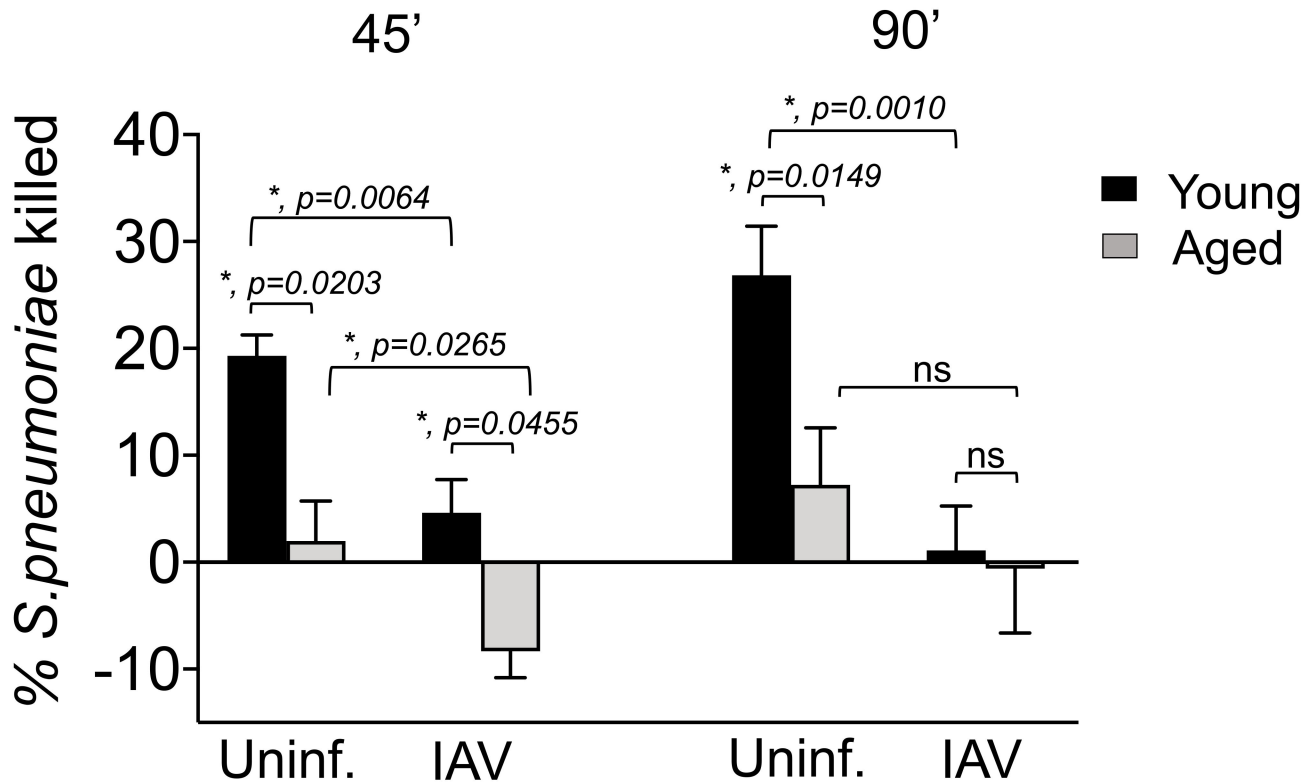

**A.****Lung**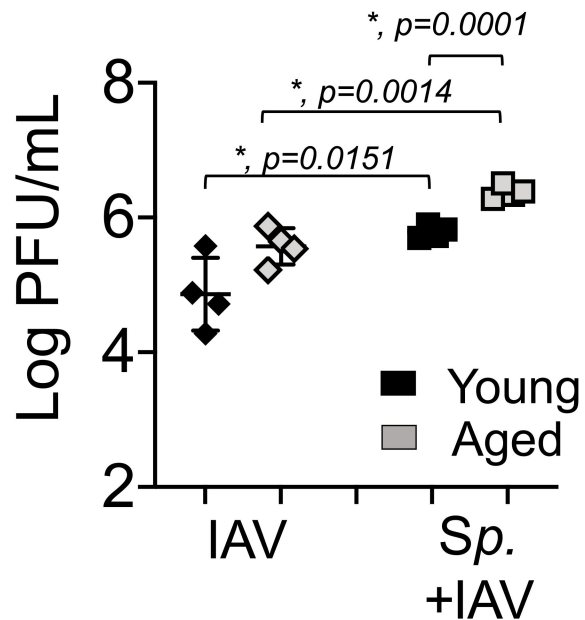**B.****Lung**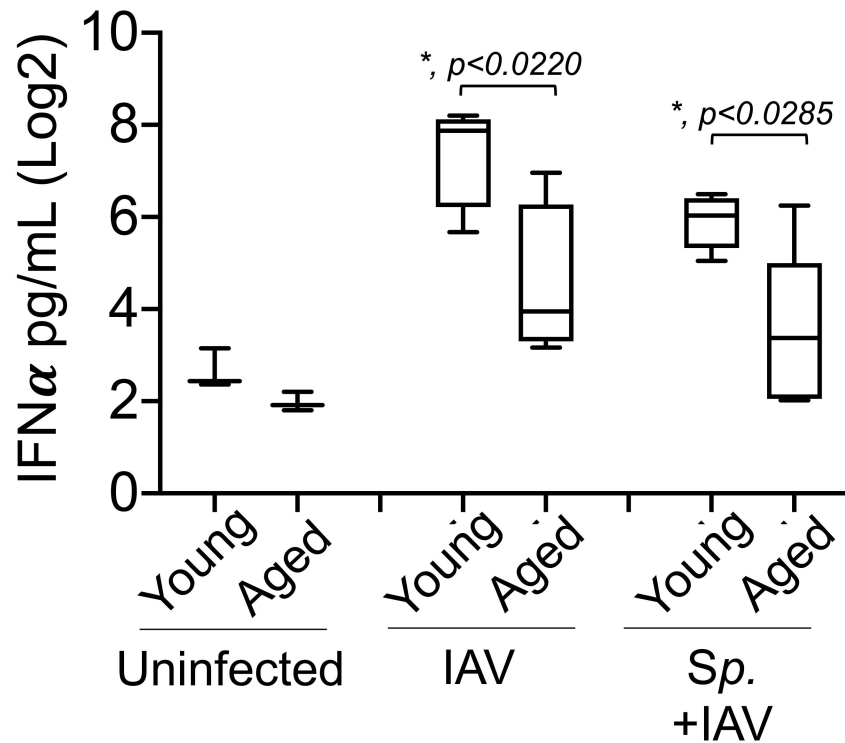

Source: https://www.biorxiv.org/content/biorxiv/early/2021/05/04/2020.07.29.227991.full.pdf
